# Supplementary material for: Conserved Metabolic Changes in Nondiabetic and Type 2 Diabetic Bariatric Surgery Patients: Global Metabolomic Pilot Study
Source: Hindawi journal article supplement (doi:10.1155/2016/3467403), 2016-01-01
Supplement: f1 [file 3467403.f1.pdf]

## Methods and Materials.

Non-targeted global metabolomics was performed by Metabolon, Inc. (Durham, NC) and employed two independent platforms: ultrahigh performance liquid chromatography/tandem mass spectrometry (UHPLC-MS/MS) optimized for basic or acidic species, and gas chromatography/mass spectrometry (GC/MS) (1,2).

For each serum sample, 100  $\mu$ L was used for analyses.

Using an automated liquid handler (Hamilton LabStar, Salt Lake City, UT), protein was precipitated with methanol that contained four standards to report on extraction efficiency. The resulting supernatant was split into equal aliquots for analysis on two platforms. Aliquots, dried under nitrogen and vacuum-desiccated, were subsequently either reconstituted in 50  $\mu$ L 0.1% formic acid in water (acidic conditions) or in 50  $\mu$ L 6.5 mM ammonium bicarbonate in water, pH 8 (basic conditions) for the two UHPLC-MS/MS analyses or derivatized to a final volume of 50  $\mu$ L for GC/MS analysis using equal parts bistrimethyl-silyl-trifluoroacetamide and solvent mixture acetonitrile: dichloromethane: cyclohexane (5:4:1) with 5% triethylamine at 60°C for 1 hour. In addition, three types of controls were analyzed in concert with the experimental samples: aliquots of a well-characterized human plasma pool served as technical replicates throughout the data set, extracted water samples served as process blanks, and a cocktail of standards spiked into every analyzed sample allowed instrument performance monitoring. Experimental samples and controls were randomized across platform run days.

UHPLC-MS/MS samples were separated using a Waters Acquity UPLC (Waters, Millford, MA) instrument with separate acid/base-dedicated 2.1 mm  $\times$  100 mm Waters BEH C18 1.7  $\mu$ m particle columns heated to 40°C and analyzed using an LTQ mass spectrometer (Thermo Fisher Scientific, Inc., Waltham, MA) which consisted of an electrospray ionization (ESI) source and linear ion-trap (LIT) mass analyzer (1). Extracts reconstituted in formic acid were gradient eluted at 350  $\mu$ L/min using (A) 0.1% formic acid in water and (B) 0.1% formic acid in methanol (0% B to 70% B in 4 min, 70-98% B in 0.5 min, 98% B for 0.9 min), whereas extracts reconstituted in ammonium bicarbonate used (A) 6.5 mM ammonium bicarbonate in water, pH 8, and (B) 6.5 mM ammonium bicarbonate in 95/5 methanol/water (same gradient profile as above) at 350  $\mu$ L/min. The MS instrument scanned 99-1000 m/z and alternated between MS and MS2 scans

using dynamic exclusion with approximately 6 scans per second. Derivatized samples for GC/MS were separated on a 5% diphenyl/ 95% dimethyl polysiloxane fused silica column with helium as the carrier gas and a temperature ramp from 60°C to 340°C and then analyzed on a Thermo-Finnigan Trace DSQ MS (Thermo Fisher Scientific, Inc.) operated at unit mass resolving power with electron impact ionization and a 50-750 atomic mass unit scan range (2).

Metabolites were identified by automated comparison of the ion features in the experimental samples to a reference library of chemical standard entries that included retention time, molecular weight (m/z), preferred adducts, and in-source fragments as well as associated MS spectra, and were curated by visual inspection for quality control using software (3). For statistical analyses and data display purposes, any missing values were assumed to be below the limits of detection and these values were imputed with the compound minimum. Statistical analysis of log-transformed data was performed using “R” (<http://cran.r-project.org/>), which is a freely available, open-source software package. Repeated measures 2-way ANOVA with post-test contrasts was performed to compare data between experimental groups and across study time points. Multiple comparisons were accounted for by estimating the false discovery rate using q-values (4).

## References.

1. Evans, A.M., DeHaven, C.D., Barrett, T., Mitchell, M. and Milgram, E. Integrated, nontargeted ultrahigh performance liquid chromatography/electrospray ionization tandem mass spectrometry platform for the identification and relative quantification of the small-molecule complement of biological systems. *Anal. Chem.* 2009; 81:6656-6667.
2. Bourdonck, K.J., Mitchell, M.W., Nemet, L., Keresztes, L., Nyska, A., Shinar, D., Rosenstock, M. Discovery of metabolomics biomarkers for early detection of nephrotoxicity. *Toxicol. Pathol.* 2009; 37:280-292.
3. DeHaven C.D., Evans A.M., Dai H., Lawton K.A. Organization of GC/MS and LC/MS Metabolomics data into Chemical Libraries. *J. Cheminform* 2010; 2(1):9.
4. Storey J.D., Tibshirani R. Statistical significance for genomewide studies. *Proc. Natl. Acad. Sci. USA* 2003; 100:9440-9445.

**Table A1. A Global Metabolomic Study: Statistical data associated with all 476 compounds detected.**

\* Green and red shaded cells indicate  $p \leq 0.05$  (green indicates that the mean values are significantly higher for that comparison; red - values significantly lower). Light green and light red shaded cells indicate  $0.05 < p < 0.10$  (light green indicates that the mean values trend higher for that comparison; light red - values trend lower).

| Biochemical Name      | Heat map of statistically significant biochemicals* |        |        |                          |        |        |                              |        |        |
|-----------------------|-----------------------------------------------------|--------|--------|--------------------------|--------|--------|------------------------------|--------|--------|
|                       | Fold Change and ANOVA Contrasts                     |        |        |                          |        |        |                              |        |        |
|                       | Pre-Op to BL Comparison                             |        |        | Post-Op to BL Comparison |        |        | Post-Op to Pre-Op Comparison |        |        |
|                       | SG Non-T2D                                          | SG T2D | GB T2D | SG Non-T2D               | SG T2D | GB T2D | SG Non-T2D                   | SG T2D | GB T2D |
| glycine               | 1                                                   | 0.78   | 0.64   | 1.57                     | 2.19   | 1.16   | 1.57                         | 2.83   | 1.81   |
| N-acetylglycine       | 1.8                                                 | 4.79   | 1.44   | 1.64                     | 1.55   | 1.83   | 0.91                         | 0.32   | 1.27   |
| dimethylglycine       | 0.73                                                | 0.84   | 0.96   | 0.57                     | 0.61   | 0.71   | 0.78                         | 0.73   | 0.74   |
| betaine               | 0.76                                                | 0.82   | 0.77   | 0.96                     | 0.97   | 0.94   | 1.25                         | 1.17   | 1.22   |
| serine                | 1.1                                                 | 0.7    | 0.79   | 2.44                     | 4.03   | 2.43   | 2.22                         | 5.79   | 3.07   |
| N-acetylserine        | 1                                                   | 0.82   | 1.08   | 4.09                     | 6.57   | 8.6    | 4.1                          | 7.97   | 8      |
| beta-hydroxypyruvate  | 1.17                                                | 1.02   | 1.13   | 0.93                     | 0.69   | 0.65   | 0.79                         | 0.67   | 0.57   |
| threonine             | 0.86                                                | 0.73   | 0.8    | 1.34                     | 1.45   | 1.65   | 1.57                         | 1.99   | 2.05   |
| N-acetylthreonine     | 0.87                                                | 0.72   | 1.29   | 1.3                      | 1.1    | 1.59   | 1.49                         | 1.54   | 1.23   |
| homoserine            | 1.4                                                 | 0.42   | 0.91   | 0.62                     | 0.59   | 0.48   | 0.44                         | 1.42   | 0.52   |
| alanine               | 0.69                                                | 0.47   | 0.71   | 0.63                     | 0.8    | 0.52   | 0.91                         | 1.7    | 0.73   |
| N-acetylalanine       | 1.03                                                | 0.85   | 0.94   | 0.94                     | 1.07   | 1.01   | 0.91                         | 1.26   | 1.07   |
| aspartate             | 0.91                                                | 0.72   | 0.67   | 2.01                     | 3.58   | 1.37   | 2.22                         | 4.94   | 2.03   |
| asparagine            | 0.92                                                | 0.94   | 0.53   | 0.92                     | 1.58   | 0.72   | 1.01                         | 1.68   | 1.35   |
| glutamate             | 0.89                                                | 0.81   | 0.81   | 1.85                     | 2.48   | 1.96   | 2.09                         | 3.05   | 2.41   |
| glutamine             | 0.88                                                | 0.81   | 0.78   | 0.88                     | 0.75   | 0.91   | 1.01                         | 0.93   | 1.17   |
| pyroglutamine*        | 1.16                                                | 0.82   | 0.98   | 2.17                     | 1.71   | 1.34   | 1.87                         | 2.09   | 1.36   |
| histidine             | 0.75                                                | 0.7    | 1.03   | 1.26                     | 1.64   | 1.82   | 1.68                         | 2.34   | 1.76   |
| 1-methylhistidine     | 0.81                                                | 0.73   | 1.02   | 1.4                      | 2.08   | 3.91   | 1.73                         | 2.87   | 3.83   |
| 3-methylhistidine     | 2.26                                                | 6.83   | 0.45   | 0.78                     | 1.66   | 0.38   | 0.34                         | 0.24   | 0.84   |
| trans-urocanate       | 0.92                                                | 1.83   | 1.33   | 103.87                   | 268.09 | 353.71 | 113.05                       | 146.41 | 266.35 |
| cis-urocanate         | 0.77                                                | 1.44   | 1.26   | 76.94                    | 329.32 | 543.33 | 99.74                        | 229.09 | 431.96 |
| imidazole propionate  | 0.8                                                 | 1.14   | 0.76   | 2.07                     | 30.7   | 6.51   | 2.59                         | 27.03  | 8.56   |
| lysine                | 0.91                                                | 0.76   | 0.71   | 1.43                     | 1.15   | 1.27   | 1.57                         | 1.52   | 1.79   |
| glutarylcarntine (C5) | 0.89                                                | 0.75   | 0.96   | 0.83                     | 0.67   | 0.79   | 0.92                         | 0.89   | 0.83   |
| pipecolate            | 1.26                                                | 0.87   | 0.49   | 0.9                      | 0.79   | 0.63   | 0.72                         | 0.91   | 1.3    |
| N-acetyl-cadaverine   | 1                                                   | 1      | 1      | 1                        | 1      | 1      | 1                            | 1      | 1      |
| phenylalanine         | 0.85                                                | 0.77   | 0.69   | 1.15                     | 1.21   | 1      | 1.36                         | 1.57   | 1.45   |
| N-acetylphenylalanine | 0.64                                                | 0.62   | 0.88   | 1.16                     | 1.51   | 1.39   | 1.82                         | 2.43   | 1.58   |
| phenyllactate (PLA)   | 0.79                                                | 0.8    | 0.65   | 0.72                     | 0.98   | 0.71   | 0.91                         | 1.22   | 1.09   |
| phenylacetate         | 1.03                                                | 0.6    | 0.91   | 0.61                     | 1.17   | 0.93   | 0.6                          | 1.94   | 1.02   |

|                                  |      |      |      |       |      |      |       |      |      |
|----------------------------------|------|------|------|-------|------|------|-------|------|------|
| 4-hydroxyphenylacetate           | 0.65 | 0.78 | 0.79 | 0.69  | 0.94 | 1.07 | 1.07  | 1.19 | 1.35 |
| phenylacetylglutamine            | 1.35 | 0.69 | 0.8  | 0.51  | 0.7  | 1.09 | 0.38  | 1.01 | 1.35 |
| tyrosine                         | 0.81 | 0.62 | 0.62 | 1.18  | 0.96 | 1.12 | 1.46  | 1.53 | 1.8  |
| N-acetyltyrosine                 | 0.86 | 0.7  | 0.67 | 9.33  | 1.56 | 1.5  | 10.91 | 2.23 | 2.23 |
| tyramine                         | 1    | 1    | 1    | 1     | 1    | 1    | 1     | 1    | 1    |
| 3-(4-hydroxyphenyl)lactate       | 0.81 | 0.64 | 0.66 | 0.65  | 0.66 | 0.65 | 0.8   | 1.03 | 1    |
| phenol sulfate                   | 0.66 | 0.73 | 0.66 | 1.34  | 1.07 | 1.19 | 2.01  | 1.47 | 1.81 |
| p-cresol sulfate                 | 0.91 | 0.65 | 0.76 | 0.61  | 0.81 | 0.83 | 0.68  | 1.23 | 1.08 |
| o-cresol sulfate                 | 3.32 | 1.02 | 1.15 | 1.07  | 1.02 | 0.4  | 0.32  | 1    | 0.35 |
| 3-methoxytyrosine                | 1.31 | 0.77 | 0.83 | 1.03  | 0.92 | 1.02 | 0.79  | 1.2  | 1.23 |
| 3-(3-hydroxyphenyl)propionate    | 0.79 | 0.89 | 0.54 | 0.86  | 1.26 | 0.48 | 1.08  | 1.42 | 0.89 |
| tryptophan                       | 0.72 | 0.63 | 0.75 | 0.87  | 0.79 | 0.82 | 1.21  | 1.26 | 1.09 |
| indolelactate                    | 0.72 | 0.59 | 0.61 | 0.63  | 0.56 | 0.5  | 0.88  | 0.94 | 0.82 |
| indoleacetate                    | 1.07 | 0.75 | 0.51 | 1.09  | 0.95 | 0.63 | 1.02  | 1.27 | 1.23 |
| indolepropionate                 | 0.73 | 0.59 | 0.38 | 0.65  | 0.65 | 0.29 | 0.89  | 1.1  | 0.75 |
| 3-indoxyl sulfate                | 0.51 | 0.51 | 0.59 | 0.6   | 0.74 | 0.64 | 1.17  | 1.46 | 1.09 |
| kynurenine                       | 0.77 | 0.64 | 0.69 | 0.71  | 0.62 | 0.58 | 0.92  | 0.97 | 0.84 |
| kynurenate                       | 1.38 | 0.87 | 1.22 | 0.93  | 0.86 | 0.83 | 0.68  | 0.98 | 0.68 |
| serotonin (5HT)                  | 0.71 | 0.62 | 0.54 | 0.41  | 0.3  | 0.31 | 0.58  | 0.48 | 0.56 |
| tryptophan betaine               | 1.03 | 0.72 | 0.84 | 0.59  | 0.65 | 0.69 | 0.57  | 0.9  | 0.82 |
| C-glycosyltryptophan             | 1.06 | 0.89 | 1.09 | 0.94  | 0.95 | 0.99 | 0.88  | 1.06 | 0.91 |
| leucine                          | 1.09 | 0.78 | 0.78 | 1.23  | 0.85 | 0.8  | 1.14  | 1.09 | 1.02 |
| 4-methyl-2-oxopentanoate         | 1.14 | 0.73 | 0.96 | 1.01  | 0.6  | 0.67 | 0.89  | 0.82 | 0.7  |
| isovalerate                      | 1.37 | 0.66 | 1.22 | 1.58  | 0.85 | 1.33 | 1.15  | 1.29 | 1.09 |
| isovalerylcarnitine              | 0.83 | 0.75 | 1.02 | 1.89  | 1.73 | 4.12 | 2.27  | 2.32 | 4.06 |
| beta-hydroxyisovalerate          | 1.9  | 0.73 | 1.52 | 20.74 | 0.54 | 0.51 | 10.91 | 0.74 | 0.34 |
| beta-hydroxyisovaleroylcarnitine | 1.1  | 0.9  | 1.7  | 0.96  | 1.02 | 1.37 | 0.87  | 1.13 | 0.81 |
| 3-methylglutaryl carnitine (C6)  | 0.68 | 0.79 | 1.18 | 0.75  | 0.51 | 0.6  | 1.1   | 0.65 | 0.51 |
| alpha-hydroxyisovalerate         | 0.99 | 0.82 | 0.98 | 1.24  | 0.76 | 0.97 | 1.25  | 0.93 | 0.99 |
| isoleucine                       | 1.04 | 0.75 | 0.79 | 1.22  | 0.91 | 0.92 | 1.18  | 1.22 | 1.17 |
| 3-methyl-2-oxovalerate           | 1.21 | 0.77 | 0.95 | 1.05  | 0.69 | 0.67 | 0.87  | 0.9  | 0.71 |
| 2-methylbutyrylcarnitine (C5)    | 0.84 | 0.65 | 0.79 | 1.08  | 0.62 | 0.85 | 1.29  | 0.96 | 1.07 |
| tiglyl carnitine                 | 1.41 | 0.89 | 2.58 | 0.72  | 0.41 | 0.64 | 0.51  | 0.46 | 0.25 |
| 2-hydroxy-3-methylvalerate       | 1.22 | 0.69 | 0.7  | 1.06  | 0.78 | 0.82 | 0.87  | 1.13 | 1.18 |
| 3-hydroxy-2-ethylpropionate      | 1.49 | 1.23 | 1.53 | 0.99  | 1.02 | 1.02 | 0.66  | 0.83 | 0.67 |
| valine                           | 1.07 | 0.81 | 0.85 | 1.1   | 0.78 | 0.79 | 1.03  | 0.97 | 0.93 |
| 3-methyl-2-oxobutyrate           | 1.26 | 1.09 | 1.28 | 0.78  | 0.67 | 0.88 | 0.62  | 0.62 | 0.69 |
| isobutyrylcarnitine              | 0.82 | 0.62 | 1.39 | 1.04  | 0.75 | 0.8  | 1.27  | 1.2  | 0.58 |
| 3-hydroxyisobutyrate             | 1.03 | 0.76 | 1.13 | 1.14  | 0.75 | 0.66 | 1.11  | 0.98 | 0.59 |
| alpha-hydroxyisocaproate         | 1.43 | 1.3  | 1.09 | 1.1   | 1.07 | 1.81 | 0.77  | 0.82 | 1.67 |
| methionine                       | 0.92 | 0.82 | 0.75 | 1.02  | 0.81 | 0.79 | 1.11  | 0.99 | 1.06 |

|                                |      |      |      |       |       |        |       |       |        |
|--------------------------------|------|------|------|-------|-------|--------|-------|-------|--------|
| N-acetylmethionine             | 0.86 | 1.09 | 0.81 | 1.02  | 1.92  | 1.02   | 1.18  | 1.76  | 1.26   |
| N-formylmethionine             | 0.97 | 0.78 | 0.84 | 0.57  | 0.56  | 0.65   | 0.58  | 0.72  | 0.77   |
| homocysteine                   | 1    | 1    | 1    | 1.75  | 2.23  | 2.39   | 1.75  | 2.23  | 2.39   |
| alpha-ketobutyrate             | 2.32 | 0.88 | 2.48 | 0.54  | 0.1   | 1.24   | 0.23  | 0.12  | 0.5    |
| 2-aminobutyrate                | 2.21 | 1.16 | 1.73 | 1.45  | 0.82  | 1.49   | 0.65  | 0.7   | 0.86   |
| 2-hydroxybutyrate (AHB)        | 2.68 | 1.21 | 2.79 | 1.27  | 0.65  | 1.54   | 0.47  | 0.54  | 0.55   |
| cysteine                       | 1.18 | 0.63 | 1.08 | 1.21  | 1.59  | 1.87   | 1.02  | 2.52  | 1.73   |
| cystine                        | 0.6  | 0.45 | 0.66 | 0.95  | 1.73  | 1.24   | 1.58  | 3.85  | 1.88   |
| S-methylcysteine               | 1.24 | 0.85 | 0.95 | 1.36  | 0.81  | 1      | 1.1   | 0.96  | 1.06   |
| 4-amino-2-hydroxybutyrate      | 1.11 | 0.7  | 1.52 | 0.81  | 0.66  | 0.76   | 0.72  | 0.94  | 0.5    |
| arginine                       | 0.93 | 0.79 | 0.77 | 0.78  | 0.69  | 0.7    | 0.84  | 0.88  | 0.91   |
| urea                           | 0.94 | 0.61 | 2.03 | 0.9   | 0.71  | 0.67   | 0.96  | 1.17  | 0.33   |
| ornithine                      | 0.59 | 0.69 | 0.93 | 6.39  | 17.59 | 23.2   | 10.81 | 25.39 | 24.82  |
| proline                        | 0.81 | 0.68 | 0.63 | 1.07  | 0.91  | 0.83   | 1.32  | 1.34  | 1.32   |
| citrulline                     | 0.9  | 1.1  | 1.36 | 0.86  | 1.55  | 1.83   | 0.95  | 1.41  | 1.35   |
| homocitrulline                 | 1.19 | 0.91 | 1.23 | 1.1   | 0.68  | 0.82   | 0.92  | 0.75  | 0.66   |
| dimethylarginine (SDMA + ADMA) | 1.07 | 1.1  | 1.07 | 0.84  | 0.82  | 0.72   | 0.78  | 0.75  | 0.68   |
| N-delta-acetylorithine*        | 0.6  | 0.42 | 1.03 | 0.94  | 0.85  | 0.77   | 1.57  | 2.01  | 0.75   |
| trans-4-hydroxyproline         | 1.08 | 0.43 | 0.55 | 2.93  | 0.68  | 0.54   | 2.71  | 1.59  | 0.99   |
| pro-hydroxy-pro                | 1.25 | 0.7  | 0.76 | 4.58  | 0.96  | 1.28   | 3.67  | 1.38  | 1.68   |
| creatine                       | 0.76 | 0.59 | 0.92 | 1.22  | 0.91  | 1.49   | 1.61  | 1.54  | 1.61   |
| creatinine                     | 1.16 | 0.91 | 1.01 | 0.93  | 0.94  | 1      | 0.8   | 1.03  | 0.98   |
| acisoga                        | 0.98 | 1    | 0.86 | 0.93  | 0.72  | 0.98   | 0.95  | 0.72  | 1.13   |
| N-acetylputrescine             | 0.79 | 1.01 | 1.16 | 0.93  | 2.11  | 1.07   | 1.17  | 2.09  | 0.92   |
| 4-acetamidobutanoate           | 1.24 | 0.78 | 0.96 | 1.3   | 0.86  | 0.78   | 1.04  | 1.1   | 0.81   |
| 4-guanidinobutanoate           | 0.72 | 0.5  | 0.67 | 0.9   | 3.03  | 1.4    | 1.25  | 6.06  | 2.1    |
| glutathione, oxidized (GSSG)   | 1.01 | 1.18 | 0.66 | 26.34 | 23.63 | 101.52 | 26.11 | 20.03 | 154.42 |
| cysteine-glutathione disulfide | 0.95 | 1.38 | 1.28 | 5.62  | 4.86  | 10.46  | 5.91  | 3.51  | 8.19   |
| cys-gly, oxidized              | 0.68 | 0.7  | 1.16 | 1.17  | 1.19  | 3.63   | 1.72  | 1.71  | 3.12   |
| 5-oxoproline                   | 0.8  | 0.66 | 0.71 | 4.01  | 7.95  | 8.08   | 4.98  | 12.04 | 11.32  |
| ophthalmate                    | 0.91 | 1.69 | 2.58 | 2.79  | 3.63  | 8.81   | 3.08  | 2.15  | 3.41   |
| gamma-glutamylalanine          | 0.58 | 0.64 | 0.77 | 0.45  | 0.5   | 0.33   | 0.77  | 0.77  | 0.43   |
| gamma-glutamylglutamate        | 1.24 | 0.8  | 0.92 | 3.99  | 5.21  | 6.96   | 3.23  | 6.48  | 7.58   |
| gamma-glutamylglutamine        | 0.82 | 0.72 | 1    | 0.77  | 0.49  | 0.56   | 0.93  | 0.68  | 0.56   |
| gamma-glutamylisoleucine*      | 0.85 | 0.56 | 0.72 | 2.52  | 1.71  | 2.09   | 2.95  | 3.06  | 2.91   |
| gamma-glutamylleucine          | 0.86 | 0.59 | 0.75 | 1.75  | 1.07  | 1.29   | 2.02  | 1.82  | 1.71   |
| gamma-glutamylmethionine       | 0.97 | 0.71 | 0.91 | 0.77  | 0.48  | 0.47   | 0.79  | 0.67  | 0.52   |
| gamma-glutamylphenylalanine    | 0.84 | 0.82 | 0.73 | 1.68  | 1.64  | 1.69   | 1.99  | 2.01  | 2.31   |
| gamma-glutamylthreonine*       | 0.88 | 0.56 | 0.94 | 2.24  | 1.81  | 2.31   | 2.55  | 3.22  | 2.46   |
| gamma-glutamyltyrosine         | 0.89 | 0.57 | 0.62 | 1.76  | 1.34  | 1.59   | 1.97  | 2.35  | 2.56   |
| gamma-glutamylvaline           | 1.23 | 0.6  | 1.14 | 1.81  | 1.21  | 1.64   | 1.48  | 2.02  | 1.44   |

|                               |      |      |      |       |        |        |       |       |        |
|-------------------------------|------|------|------|-------|--------|--------|-------|-------|--------|
| N-acetylcarnosine             | 1.06 | 0.72 | 0.79 | 0.93  | 0.78   | 0.68   | 0.88  | 1.08  | 0.85   |
| alpha-glutamylglutamate       | 0.61 | 1.32 | 0.25 | 1.49  | 6.03   | 1.55   | 2.45  | 4.57  | 6.09   |
| alpha-glutamyltyrosine        | 0.84 | 0.94 | 1.16 | 0.42  | 0.46   | 0.98   | 0.5   | 0.48  | 0.85   |
| aspartylleucine               | 0.67 | 0.66 | 0.91 | 0.72  | 2.8    | 1.19   | 1.08  | 4.21  | 1.32   |
| aspartylphenylalanine         | 0.55 | 0.67 | 0.98 | 0.32  | 1.22   | 0.37   | 0.58  | 1.81  | 0.38   |
| cyclo(glu-glu)                | 0.64 | 1.02 | 0.63 | 2.79  | 5.63   | 4.98   | 4.36  | 5.52  | 7.93   |
| cyclo(leu-pro)                | 0.57 | 1.11 | 0.46 | 0.81  | 0.76   | 0.38   | 1.42  | 0.69  | 0.83   |
| glycylglycine                 | 0.78 | 1    | 0.61 | 1.09  | 1.92   | 1.32   | 1.4   | 1.93  | 2.16   |
| glycylphenylalanine           | 0.86 | 1.35 | 0.95 | 0.78  | 1.96   | 0.89   | 0.9   | 1.45  | 0.94   |
| glycylvaline                  | 0.9  | 0.47 | 0.37 | 0.41  | 1.88   | 0.42   | 0.46  | 4.01  | 1.14   |
| histidyltryptophan            | 1.4  | 1.65 | 0.99 | 1.37  | 2.6    | 0.85   | 0.99  | 1.58  | 0.87   |
| isoleucylvaline               | 1.42 | 0.73 | 1.01 | 0.31  | 0.28   | 0.3    | 0.22  | 0.39  | 0.3    |
| leucylalanine                 | 0.77 | 0.68 | 1.47 | 0.26  | 0.64   | 0.39   | 0.34  | 0.94  | 0.26   |
| phenylalanylglutamate         | 0.62 | 1.24 | 1.37 | 4.45  | 10.76  | 4.01   | 7.16  | 8.67  | 2.93   |
| phenylalanylleucine           | 0.49 | 0.48 | 1.44 | 0.53  | 1.79   | 0.65   | 1.06  | 3.74  | 0.45   |
| phenylalanylphenylalanine     | 0.58 | 0.88 | 0.95 | 0.34  | 0.76   | 0.38   | 0.59  | 0.86  | 0.4    |
| phenylalanylserine            | 0.6  | 1.1  | 1.3  | 0.23  | 0.66   | 0.6    | 0.38  | 0.61  | 0.46   |
| phenylalanyltryptophan        | 0.71 | 0.68 | 1.25 | 0.36  | 0.44   | 0.48   | 0.51  | 0.65  | 0.38   |
| prolylglycine                 | 0.82 | 0.73 | 0.8  | 4.23  | 3.09   | 7.75   | 5.18  | 4.23  | 9.68   |
| pyroglutamylglycine           | 0.68 | 0.7  | 0.53 | 0.91  | 1.74   | 0.58   | 1.33  | 2.5   | 1.1    |
| pyroglutamylvaline            | 0.95 | 0.74 | 0.8  | 81.09 | 111.34 | 180.96 | 84.99 | 150.6 | 226.67 |
| seryltyrosine                 | 1.19 | 1.99 | 1.74 | 1.54  | 1.35   | 1.16   | 1.29  | 0.68  | 0.67   |
| threonylphenylalanine         | 1    | 1.06 | 0.91 | 0.61  | 0.62   | 0.49   | 0.61  | 0.59  | 0.53   |
| tryptophylglutamate           | 1.52 | 1.13 | 0.5  | 4.43  | 12.82  | 2.1    | 2.92  | 11.31 | 4.25   |
| tyrosylglutamate              | 1.05 | 1.3  | 1.23 | 2.55  | 7.02   | 5.44   | 2.44  | 5.39  | 4.42   |
| valylarginine                 | 0.79 | 0.73 | 1.4  | 0.25  | 0.4    | 0.36   | 0.32  | 0.54  | 0.26   |
| bradykinin, des-arg(9)        | 1.72 | 1.6  | 2.35 | 1     | 1.11   | 1      | 0.58  | 0.69  | 0.43   |
| HWESASXX*                     | 2.74 | 0.65 | 1.05 | 1.18  | 0.94   | 0.87   | 0.43  | 1.45  | 0.83   |
| ADSGEGDFXAEGGGVR*             | 1.05 | 7.36 | 0.96 | 1.1   | 0.6    | 0.96   | 1.05  | 0.08  | 1.01   |
| DSGEGDFXAEGGGVR*              | 2.51 | 1.23 | 0.88 | 1.2   | 0.2    | 0.76   | 0.48  | 0.16  | 0.87   |
| ADpSGEGDFXAEGGGVR*            | 2.86 | 2.27 | 0.7  | 3.54  | 2.09   | 3.38   | 1.24  | 0.92  | 4.8    |
| 1,5-anhydroglucitol (1,5-AG)  | 0.94 | 0.86 | 0.93 | 0.73  | 0.81   | 0.63   | 0.77  | 0.94  | 0.68   |
| glucose                       | 1.07 | 0.8  | 1.18 | 0.76  | 0.53   | 0.76   | 0.71  | 0.67  | 0.64   |
| 2,3-diphosphoglycerate        | 1    | 1    | 1    | 1     | 1      | 1      | 1     | 1     | 1      |
| 3-phosphoglycerate            | 1.03 | 1.01 | 0.93 | 8.83  | 17.11  | 37.08  | 8.55  | 16.99 | 39.97  |
| pyruvate                      | 1.05 | 0.89 | 1.24 | 0.44  | 0.3    | 0.53   | 0.42  | 0.34  | 0.43   |
| lactate                       | 1.06 | 1.54 | 1.51 | 1.09  | 2.44   | 1      | 1.03  | 1.59  | 0.66   |
| glycerate                     | 0.99 | 0.68 | 0.69 | 1.77  | 2.74   | 1.07   | 1.78  | 4.01  | 1.55   |
| ribulose/xylulose 5-phosphate | 0.87 | 1    | 1.91 | 9.26  | 9.94   | 16.01  | 10.7  | 9.94  | 8.37   |
| ribulose                      | 1.56 | 0.94 | 1.09 | 11.87 | 7.51   | 5.14   | 7.6   | 8.01  | 4.71   |
| ribose                        | 0.81 | 1.05 | 1.19 | 3.98  | 3.07   | 1.77   | 4.89  | 2.92  | 1.49   |

|                            |      |      |      |       |       |       |       |       |       |
|----------------------------|------|------|------|-------|-------|-------|-------|-------|-------|
| ribitol                    | 1.01 | 0.76 | 0.84 | 0.8   | 2.37  | 0.77  | 0.8   | 3.11  | 0.92  |
| xylulose                   | 1.41 | 3.37 | 1.97 | 8.38  | 16.31 | 10.84 | 5.95  | 4.84  | 5.51  |
| xylonate                   | 0.74 | 0.28 | 0.6  | 1.4   | 0.47  | 0.84  | 1.9   | 1.72  | 1.39  |
| xylose                     | 1.05 | 0.69 | 0.82 | 0.83  | 1.12  | 0.74  | 0.79  | 1.63  | 0.91  |
| xylitol                    | 2.23 | 1.17 | 1.1  | 1.14  | 1.29  | 2.17  | 0.51  | 1.1   | 1.98  |
| arabinose                  | 0.73 | 0.97 | 0.92 | 0.4   | 0.49  | 0.62  | 0.55  | 0.5   | 0.67  |
| threitol                   | 0.96 | 0.62 | 0.93 | 0.75  | 0.89  | 0.68  | 0.79  | 1.43  | 0.73  |
| arabitol                   | 0.81 | 0.55 | 1.42 | 0.7   | 0.67  | 0.84  | 0.87  | 1.21  | 0.59  |
| fucose                     | 1.23 | 0.78 | 0.95 | 0.41  | 0.75  | 0.59  | 0.33  | 0.97  | 0.62  |
| maltotriose                | 0.53 | 0.77 | 1.71 | 1.97  | 6.28  | 4.64  | 3.74  | 8.2   | 2.71  |
| sucrose                    | 0.27 | 0.4  | 0.14 | 2.7   | 35.83 | 6.45  | 9.85  | 89.85 | 44.52 |
| fructose                   | 1.48 | 0.61 | 0.88 | 0.56  | 0.48  | 0.31  | 0.38  | 0.78  | 0.35  |
| sorbitol                   | 0.56 | 0.53 | 0.75 | 6.39  | 4.52  | 5.64  | 11.31 | 8.49  | 7.56  |
| mannose                    | 1.59 | 0.96 | 1.52 | 0.79  | 0.51  | 0.69  | 0.5   | 0.53  | 0.46  |
| mannitol                   | 0.16 | 0.63 | 1.17 | 0.38  | 1.04  | 0.36  | 2.46  | 1.65  | 0.31  |
| glucuronate                | 0.66 | 0.34 | 1.1  | 0.47  | 0.12  | 0.33  | 0.71  | 0.36  | 0.3   |
| N-acetylneuraminate        | 1.03 | 0.75 | 1.33 | 1.05  | 1.76  | 1.54  | 1.02  | 2.34  | 1.16  |
| erythronate*               | 0.88 | 0.6  | 1.02 | 0.74  | 0.84  | 0.87  | 0.84  | 1.42  | 0.85  |
| citrate                    | 1.51 | 1.12 | 1.27 | 1.16  | 1.56  | 1.39  | 0.77  | 1.38  | 1.09  |
| alpha-ketoglutarate        | 0.87 | 0.54 | 0.87 | 0.66  | 0.61  | 0.49  | 0.77  | 1.12  | 0.57  |
| succinylcarnitine          | 0.91 | 0.95 | 1.09 | 1.43  | 1.41  | 2.56  | 1.57  | 1.48  | 2.36  |
| fumarate                   | 1.2  | 0.82 | 0.82 | 1.55  | 2.71  | 2.04  | 1.29  | 3.31  | 2.48  |
| malate                     | 0.79 | 0.78 | 0.68 | 2.29  | 4.24  | 3.03  | 2.91  | 5.42  | 4.43  |
| acetylphosphate            | 1.07 | 0.7  | 0.89 | 0.94  | 0.75  | 0.93  | 0.88  | 1.07  | 1.05  |
| pyrophosphate (PPi)        | 2.2  | 0.88 | 0.95 | 2.41  | 0.67  | 0.94  | 1.09  | 0.75  | 0.98  |
| phosphate                  | 0.89 | 0.78 | 0.91 | 0.91  | 0.99  | 1.22  | 1.03  | 1.27  | 1.35  |
| caproate (6:0)             | 1.12 | 0.96 | 0.91 | 0.8   | 1.08  | 0.91  | 0.72  | 1.12  | 1.01  |
| heptanoate (7:0)           | 0.96 | 1.05 | 1.24 | 17.47 | 0.99  | 1.22  | 18.13 | 0.94  | 0.99  |
| caprylate (8:0)            | 0.94 | 1.01 | 0.75 | 1.22  | 1.6   | 1.45  | 1.3   | 1.58  | 1.92  |
| pelargonate (9:0)          | 0.78 | 0.68 | 0.91 | 0.59  | 0.48  | 0.51  | 0.76  | 0.7   | 0.56  |
| caprate (10:0)             | 0.65 | 1.02 | 0.74 | 0.69  | 1.3   | 1.04  | 1.07  | 1.27  | 1.41  |
| 10-undecenoate (11:1n1)    | 1.09 | 0.53 | 1.1  | 0.9   | 0.63  | 1.07  | 0.82  | 1.19  | 0.97  |
| laurate (12:0)             | 1.16 | 1.58 | 2.31 | 1.56  | 3.65  | 2.19  | 1.34  | 2.31  | 0.95  |
| 5-dodecenoate (12:1n7)     | 1.26 | 1.19 | 1.39 | 0.92  | 1.17  | 1.31  | 0.73  | 0.98  | 0.95  |
| myristate (14:0)           | 1.52 | 1.49 | 2.01 | 1.34  | 2.18  | 3.84  | 0.88  | 1.46  | 1.92  |
| myristoleate (14:1n5)      | 1.97 | 1.99 | 2.16 | 1.61  | 3.12  | 2.52  | 0.82  | 1.57  | 1.17  |
| pentadecanoate (15:0)      | 1.69 | 1.18 | 1.13 | 3.02  | 3.36  | 2.44  | 1.79  | 2.84  | 2.15  |
| palmitate (16:0)           | 1.53 | 1.31 | 1.62 | 1.04  | 1.08  | 1.51  | 0.68  | 0.82  | 0.93  |
| palmitoleate (16:1n7)      | 2.4  | 1.79 | 2.68 | 1.54  | 1.7   | 2.23  | 0.64  | 0.95  | 0.83  |
| margarate (17:0)           | 1.83 | 1.36 | 1.8  | 1.32  | 1.27  | 2.21  | 0.72  | 0.93  | 1.23  |
| 10-heptadecenoate (17:1n7) | 1.9  | 1.5  | 1.93 | 2.29  | 3.8   | 2.94  | 1.21  | 2.53  | 1.52  |

|                                                      |      |      |      |      |      |       |      |      |       |
|------------------------------------------------------|------|------|------|------|------|-------|------|------|-------|
| stearate (18:0)                                      | 1.39 | 1.22 | 1.39 | 0.97 | 1.05 | 1.41  | 0.7  | 0.86 | 1.01  |
| oleate (18:1n9)                                      | 2.84 | 1.74 | 3.11 | 1.57 | 1.12 | 2.18  | 0.55 | 0.64 | 0.7   |
| cis-vaccenate (18:1n7)                               | 2.18 | 1.52 | 2.07 | 1.39 | 1.13 | 1.63  | 0.64 | 0.75 | 0.79  |
| nonadecanoate (19:0)                                 | 1.35 | 1.13 | 1.09 | 1.51 | 1.6  | 2.6   | 1.12 | 1.42 | 2.39  |
| 10-nonadecenoate (19:1n9)                            | 2.53 | 1.72 | 2.08 | 1.71 | 2.09 | 2.41  | 0.68 | 1.21 | 1.16  |
| eicosenoate (20:1n9 or 11)                           | 2.8  | 1.87 | 2.62 | 1.7  | 1.61 | 2.91  | 0.61 | 0.86 | 1.11  |
| stearidonate (18:4n3)                                | 1.46 | 1.4  | 2.82 | 1    | 1.01 | 1.32  | 0.68 | 0.72 | 0.47  |
| eicosapentaenoate (EPA; 20:5n3)                      | 1.14 | 1.19 | 1.39 | 0.63 | 0.66 | 1.15  | 0.55 | 0.56 | 0.82  |
| docosapentaenoate (n3 DPA; 22:5n3)                   | 1.72 | 1.59 | 2.36 | 0.96 | 0.84 | 1.97  | 0.56 | 0.53 | 0.83  |
| docosahexaenoate (DHA; 22:6n3)                       | 1.26 | 1.06 | 1.2  | 0.73 | 0.71 | 1.24  | 0.58 | 0.67 | 1.03  |
| linoleate (18:2n6)                                   | 1.93 | 1.46 | 2.09 | 0.98 | 0.91 | 1.56  | 0.51 | 0.62 | 0.74  |
| linolenate [alpha or gamma; (18:3n3 or 6)]           | 2.81 | 1.6  | 2.67 | 0.84 | 0.75 | 1.4   | 0.3  | 0.47 | 0.53  |
| dihomo-linolenate (20:3n3 or n6)                     | 1.24 | 1.09 | 1.62 | 0.76 | 0.75 | 1.22  | 0.61 | 0.69 | 0.75  |
| arachidonate (20:4n6)                                | 1.16 | 0.93 | 0.96 | 0.84 | 1.08 | 1.2   | 0.72 | 1.16 | 1.25  |
| adrenate (22:4n6)                                    | 0.96 | 1.12 | 0.65 | 0.53 | 0.75 | 0.55  | 0.56 | 0.67 | 0.85  |
| docosapentaenoate (n6 DPA; 22:5n6)                   | 1.54 | 1.08 | 1.22 | 0.85 | 0.8  | 1.13  | 0.55 | 0.74 | 0.93  |
| docosadienoate (22:2n6)                              | 1.84 | 1.68 | 1.76 | 2.33 | 3.17 | 3.28  | 1.27 | 1.88 | 1.86  |
| dihomo-linoleate (20:2n6)                            | 2.33 | 1.77 | 2.64 | 1.43 | 1.57 | 2.8   | 0.61 | 0.89 | 1.06  |
| 13-methylmyristic acid                               | 1.05 | 0.93 | 1.28 | 1.05 | 1.06 | 2.15  | 1    | 1.13 | 1.68  |
| 15-methylpalmitate (isobar with 2-methylpalmitate)   | 1.58 | 1.29 | 1.33 | 2.12 | 4.94 | 2.26  | 1.34 | 3.84 | 1.7   |
| 17-methylstearate                                    | 1.92 | 1.38 | 1.17 | 1.71 | 2.36 | 2.23  | 0.89 | 1.71 | 1.92  |
| 2-hydroxyglutarate                                   | 0.74 | 1.09 | 0.63 | 1.04 | 1.77 | 1.1   | 1.4  | 1.62 | 1.74  |
| azelate (nonanedioate)                               | 3.4  | 4.6  | 1.43 | 3.96 | 6    | 21.88 | 1.16 | 1.31 | 15.32 |
| sebacate (decanedioate)                              | 2.39 | 1.73 | 0.94 | 5.28 | 3.68 | 6.45  | 2.21 | 2.13 | 6.88  |
| undecanedioate                                       | 1.34 | 0.55 | 0.61 | 3.02 | 2.92 | 3.61  | 2.25 | 5.35 | 5.93  |
| 1,11-undecanedicarboxylate                           | 0.9  | 0.83 | 0.64 | 4.51 | 8.2  | 26.79 | 4.99 | 9.82 | 41.8  |
| dodecanedioate                                       | 1.76 | 1.17 | 0.96 | 1.76 | 1.93 | 1.42  | 1    | 1.64 | 1.48  |
| tetradecanedioate                                    | 1.89 | 1.48 | 1.15 | 1.1  | 0.9  | 0.8   | 0.58 | 0.6  | 0.7   |
| hexadecanedioate                                     | 1.76 | 1.64 | 1.24 | 1.17 | 1.13 | 1.18  | 0.66 | 0.69 | 0.96  |
| octadecanedioate                                     | 2.09 | 1.56 | 1.29 | 1.51 | 1.22 | 1.42  | 0.72 | 0.78 | 1.1   |
| 3-carboxy-4-methyl-5-propyl-2-furanpropanoate (CMPF) | 1.14 | 0.64 | 0.85 | 0.43 | 0.44 | 0.64  | 0.38 | 0.7  | 0.75  |
| palmitate, methyl ester                              | 0.97 | 0.52 | 0.92 | 0.42 | 0.35 | 0.61  | 0.44 | 0.67 | 0.66  |
| n-Butyl Oleate                                       | 0.92 | 1.4  | 1.26 | 0.88 | 1.3  | 1.23  | 0.95 | 0.92 | 0.98  |
| 2-aminoheptanoate                                    | 0.71 | 0.59 | 0.41 | 0.72 | 0.61 | 0.56  | 1.01 | 1.04 | 1.35  |
| 2-aminooctanoate                                     | 0.82 | 0.62 | 0.54 | 0.79 | 0.74 | 0.59  | 0.97 | 1.18 | 1.09  |
| butyrylcarnitine                                     | 0.79 | 0.64 | 0.75 | 1.07 | 0.81 | 0.82  | 1.35 | 1.26 | 1.09  |
| propionylcarnitine                                   | 0.58 | 0.52 | 0.93 | 1.13 | 0.8  | 1.2   | 1.92 | 1.54 | 1.29  |
| acetylcarnitine                                      | 1.74 | 1.29 | 1.63 | 1.71 | 1.16 | 1.55  | 0.98 | 0.9  | 0.95  |
| hydroxybutyrylcarnitine*                             | 8.65 | 3.87 | 6.95 | 5.99 | 2.83 | 4.89  | 0.69 | 0.73 | 0.7   |
| hexanoylcarnitine                                    | 0.87 | 0.91 | 1.12 | 1.17 | 0.88 | 1.6   | 1.34 | 0.97 | 1.42  |
| octanoylcarnitine                                    | 0.53 | 0.54 | 0.8  | 0.9  | 0.41 | 1.43  | 1.68 | 0.76 | 1.79  |



|                                                   |       |      |       |      |       |      |      |       |      |
|---------------------------------------------------|-------|------|-------|------|-------|------|------|-------|------|
| decanoylcarnitine                                 | 0.48  | 0.57 | 0.68  | 0.93 | 0.7   | 1.27 | 1.95 | 1.24  | 1.88 |
| cis-4-decenoyl carnitine                          | 0.57  | 0.59 | 0.61  | 0.78 | 0.67  | 1.19 | 1.37 | 1.15  | 1.94 |
| laurylcarnitine                                   | 0.79  | 0.43 | 0.97  | 0.9  | 0.53  | 1    | 1.14 | 1.23  | 1.03 |
| palmitoylcarnitine                                | 1.25  | 0.91 | 1.36  | 0.9  | 0.87  | 1.5  | 0.72 | 0.96  | 1.1  |
| stearoylcarnitine                                 | 1.09  | 1.26 | 1.09  | 0.8  | 0.8   | 1.31 | 0.73 | 0.63  | 1.2  |
| oleoylcarnitine                                   | 1.2   | 0.71 | 1.19  | 0.81 | 0.92  | 1.73 | 0.68 | 1.29  | 1.45 |
| deoxycarnitine                                    | 0.93  | 0.7  | 0.95  | 1.03 | 0.96  | 1.28 | 1.11 | 1.36  | 1.34 |
| carnitine                                         | 1.03  | 0.99 | 1.11  | 0.99 | 0.86  | 0.9  | 0.95 | 0.88  | 0.81 |
| 3-dehydrocarnitine                                | 0.94  | 0.81 | 1.05  | 1.02 | 0.73  | 1.03 | 1.08 | 0.9   | 0.98 |
| acetoacetate                                      | 13.88 | 5.66 | 8.71  | 2.06 | 0.46  | 3.58 | 0.15 | 0.08  | 0.41 |
| 3-hydroxybutyrate (BHBA)                          | 18.77 | 5.79 | 11.25 | 9.44 | 2.5   | 5.87 | 0.5  | 0.43  | 0.52 |
| 2-hydroxydecanoate                                | 0.81  | 0.36 | 0.52  | 0.61 | 0.61  | 1.46 | 0.75 | 1.69  | 2.81 |
| 2-hydroxypalmitate                                | 1.08  | 0.93 | 0.95  | 0.76 | 0.97  | 1.53 | 0.7  | 1.04  | 1.61 |
| 2-hydroxystearate                                 | 0.87  | 0.73 | 0.76  | 0.64 | 1.01  | 1.35 | 0.73 | 1.38  | 1.77 |
| 3-hydroxypropanoate                               | 1.07  | 0.86 | 0.9   | 1.21 | 0.9   | 0.95 | 1.14 | 1.04  | 1.05 |
| 3-hydroxyoctanoate                                | 1.43  | 0.76 | 0.39  | 0.93 | 0.61  | 0.59 | 0.65 | 0.81  | 1.49 |
| 3-hydroxydecanoate                                | 1.22  | 0.69 | 0.46  | 0.96 | 0.72  | 0.77 | 0.78 | 1.04  | 1.68 |
| 13-HODE + 9-HODE                                  | 4.57  | 2.46 | 2.32  | 1.34 | 2.49  | 3.74 | 0.29 | 1.01  | 1.61 |
| prostaglandin E2                                  | 1     | 1    | 1     | 1    | 1.26  | 1.53 | 1    | 1.26  | 1.53 |
| 12-HETE                                           | 0.78  | 1.26 | 0.86  | 1.39 | 13.96 | 2.22 | 1.79 | 11.06 | 2.58 |
| myo-inositol                                      | 0.99  | 0.69 | 1.44  | 0.95 | 0.88  | 1.28 | 0.95 | 1.27  | 0.89 |
| chiro-inositol                                    | 1.1   | 1.49 | 0.58  | 0.49 | 0.7   | 3.1  | 0.45 | 0.47  | 5.39 |
| scyllo-inositol                                   | 0.93  | 0.65 | 2.03  | 0.95 | 0.7   | 1.76 | 1.02 | 1.08  | 0.87 |
| inositol 1-phosphate (I1P)                        | 0.76  | 0.65 | 0.8   | 0.75 | 0.59  | 0.78 | 0.99 | 0.91  | 0.97 |
| choline                                           | 0.69  | 0.69 | 0.68  | 1.01 | 1.07  | 0.95 | 1.47 | 1.55  | 1.39 |
| glycerophosphorylcholine (GPC)                    | 0.87  | 1.04 | 0.8   | 0.96 | 1.77  | 2.05 | 1.11 | 1.71  | 2.58 |
| 1-myristoylglycerophosphocholine (14:0)           | 0.33  | 0.32 | 0.82  | 0.27 | 0.31  | 0.28 | 0.81 | 0.99  | 0.34 |
| 2-myristoylglycerophosphocholine*                 | 0.23  | 0.49 | 0.71  | 0.21 | 0.66  | 0.33 | 0.93 | 1.36  | 0.47 |
| 1-pentadecanoylglycerophosphocholine (15:0)*      | 0.8   | 0.37 | 0.9   | 0.61 | 0.42  | 0.7  | 0.76 | 1.13  | 0.78 |
| 1-palmitoylglycerophosphocholine (16:0)           | 0.79  | 0.63 | 0.8   | 0.55 | 0.61  | 0.6  | 0.7  | 0.98  | 0.74 |
| 2-palmitoylglycerophosphocholine*                 | 0.77  | 0.44 | 0.75  | 0.45 | 0.43  | 0.53 | 0.58 | 0.98  | 0.71 |
| 1-palmitoleoylglycerophosphocholine (16:1)*       | 0.6   | 0.44 | 0.67  | 0.37 | 0.39  | 0.4  | 0.61 | 0.89  | 0.6  |
| 1-margaroylglycerophosphocholine (17:0)           | 0.71  | 0.36 | 0.68  | 0.43 | 0.44  | 0.7  | 0.61 | 1.21  | 1.03 |
| 1-stearoylglycerophosphocholine (18:0)            | 0.48  | 0.61 | 0.74  | 0.33 | 0.59  | 0.46 | 0.7  | 0.97  | 0.62 |
| 2-stearoylglycerophosphocholine*                  | 0.29  | 0.57 | 0.68  | 0.32 | 0.61  | 0.45 | 1.11 | 1.06  | 0.66 |
| 1-oleoylglycerophosphocholine (18:1)              | 0.78  | 0.55 | 0.75  | 0.37 | 0.42  | 0.51 | 0.47 | 0.76  | 0.68 |
| 2-oleoylglycerophosphocholine*                    | 0.89  | 0.68 | 0.9   | 0.53 | 0.55  | 0.75 | 0.6  | 0.81  | 0.83 |
| 1-linoleoylglycerophosphocholine (18:2n6)         | 0.65  | 0.5  | 0.65  | 0.31 | 0.3   | 0.39 | 0.47 | 0.59  | 0.61 |
| 2-linoleoylglycerophosphocholine*                 | 0.69  | 0.4  | 0.58  | 0.36 | 0.31  | 0.39 | 0.53 | 0.76  | 0.66 |
| 1-linolenoylglycerophosphocholine (18:3n3)*       | 0.4   | 0.51 | 0.81  | 0.18 | 0.32  | 0.34 | 0.46 | 0.63  | 0.41 |
| 1-dihomo-linoleoylglycerophosphocholine (20:2n6)* | 0.48  | 0.5  | 0.65  | 0.31 | 0.34  | 0.44 | 0.64 | 0.68  | 0.67 |

|                                                   |      |      |      |      |      |      |      |      |      |
|---------------------------------------------------|------|------|------|------|------|------|------|------|------|
| 1-eicosatrienoylglycerophosphocholine (20:3)*     | 0.57 | 0.35 | 0.78 | 0.2  | 0.16 | 0.32 | 0.35 | 0.47 | 0.41 |
| 1-arachidonoylglycerophosphocholine (20:4n6)*     | 1.37 | 0.64 | 0.92 | 0.46 | 0.37 | 0.49 | 0.33 | 0.58 | 0.53 |
| 2-arachidonoylglycerophosphocholine*              | 1.21 | 0.75 | 1.04 | 0.67 | 0.75 | 0.61 | 0.55 | 1.01 | 0.59 |
| 1-eicosapentaenoylglycerophosphocholine (20:5n3)* | 0.62 | 0.5  | 1.13 | 0.15 | 0.2  | 0.5  | 0.24 | 0.4  | 0.45 |
| 1-docosapentaenoylglycerophosphocholine (22:5n3)* | 1.02 | 0.84 | 0.93 | 0.54 | 0.45 | 0.77 | 0.53 | 0.54 | 0.83 |
| 1-docosahexaenoylglycerophosphocholine (22:6n3)*  | 1.36 | 0.83 | 1.04 | 0.53 | 0.49 | 0.89 | 0.39 | 0.58 | 0.85 |
| 1-palmitoylplasmenylethanolamine*                 | 0.41 | 0.55 | 0.69 | 0.72 | 2.02 | 1.15 | 1.77 | 3.68 | 1.66 |
| 1-stearoylplasmenylethanolamine*                  | 0.97 | 0.94 | 0.43 | 1.54 | 3    | 0.49 | 1.58 | 3.2  | 1.16 |
| 1-palmitoylglycerophosphoethanolamine             | 0.77 | 0.71 | 1.01 | 0.74 | 0.97 | 0.97 | 0.96 | 1.36 | 0.96 |
| 2-palmitoylglycerophosphoethanolamine*            | 0.79 | 0.84 | 1.14 | 0.73 | 1.3  | 1.03 | 0.92 | 1.54 | 0.9  |
| 1-stearoylglycerophosphoethanolamine              | 0.69 | 0.78 | 0.91 | 0.72 | 1.26 | 0.72 | 1.04 | 1.62 | 0.79 |
| 1-oleoylglycerophosphoethanolamine                | 0.69 | 0.62 | 0.81 | 0.45 | 0.68 | 0.56 | 0.66 | 1.09 | 0.69 |
| 2-oleoylglycerophosphoethanolamine*               | 0.72 | 0.57 | 0.87 | 0.46 | 0.7  | 0.64 | 0.63 | 1.24 | 0.73 |
| 1-linoleoylglycerophosphoethanolamine*            | 0.51 | 0.52 | 0.6  | 0.39 | 0.46 | 0.41 | 0.76 | 0.88 | 0.68 |
| 2-linoleoylglycerophosphoethanolamine*            | 0.48 | 0.59 | 0.63 | 0.4  | 0.61 | 0.52 | 0.83 | 1.04 | 0.82 |
| 1-arachidonoylglycerophosphoethanolamine*         | 0.92 | 0.81 | 0.87 | 0.74 | 0.76 | 0.78 | 0.81 | 0.93 | 0.9  |
| 2-arachidonoylglycerophosphoethanolamine*         | 0.9  | 0.99 | 0.93 | 0.82 | 1.01 | 0.93 | 0.91 | 1.02 | 1    |
| 2-docosahexaenoylglycerophosphoethanolamine*      | 1.1  | 0.72 | 0.59 | 1.26 | 0.73 | 0.59 | 1.14 | 1    | 0.99 |
| 1-docosahexaenoylglycerophosphoethanolamine*      | 1.11 | 1.05 | 1.13 | 0.88 | 0.99 | 1.2  | 0.8  | 0.94 | 1.06 |
| 1-palmitoylglycerophosphoinositol*                | 0.52 | 0.53 | 0.9  | 0.3  | 0.39 | 0.54 | 0.58 | 0.73 | 0.6  |
| 1-stearoylglycerophosphoinositol                  | 0.65 | 0.66 | 0.71 | 0.29 | 0.38 | 0.57 | 0.44 | 0.58 | 0.8  |
| 2-stearoylglycerophosphoinositol*                 | 0.68 | 0.69 | 0.77 | 0.49 | 0.26 | 0.55 | 0.72 | 0.38 | 0.71 |
| 1-arachidonoylglycerophosphoinositol*             | 1.03 | 0.72 | 1.12 | 0.47 | 0.44 | 0.69 | 0.45 | 0.61 | 0.61 |
| 1-palmitoylglycerophosphate                       | 1.07 | 0.6  | 0.67 | 0.81 | 1.22 | 1.02 | 0.76 | 2.02 | 1.51 |
| 1-arachidonoylglycerophosphate                    | 1.07 | 0.55 | 0.89 | 0.63 | 1    | 0.89 | 0.59 | 1.83 | 1    |
| glycerol                                          | 1.98 | 1.99 | 1.85 | 3.25 | 8.37 | 3.51 | 1.64 | 4.21 | 1.9  |
| glycerol 3-phosphate (G3P)                        | 0.67 | 0.56 | 0.71 | 0.61 | 1.27 | 0.97 | 0.91 | 2.27 | 1.37 |
| 1-myristoylglycerol (1-monomyristin)              | 1.16 | 1.4  | 4.99 | 0.59 | 0.61 | 0.42 | 0.51 | 0.44 | 0.08 |
| 1-palmitoylglycerol (1-monopalmitin)              | 1.78 | 1.77 | 2.72 | 1.22 | 1.61 | 0.8  | 0.68 | 0.91 | 0.29 |
| 2-palmitoylglycerol (2-monopalmitin)              | 0.91 | 1.06 | 1.34 | 1    | 1.04 | 1.02 | 1.1  | 0.98 | 0.76 |
| 1-stearoylglycerol (1-monostearin)                | 0.71 | 0.84 | 1.16 | 0.69 | 0.98 | 0.88 | 0.98 | 1.16 | 0.76 |
| 1-oleoylglycerol (1-monoolein)                    | 7.26 | 3.84 | 5.8  | 2.05 | 0.94 | 0.76 | 0.28 | 0.25 | 0.13 |
| 1-linoleoylglycerol (1-monolinolein)              | 6.48 | 4.75 | 5.77 | 1.87 | 1.15 | 0.73 | 0.29 | 0.24 | 0.13 |
| 1-linolenoylglycerol                              | 9.97 | 7.16 | 7.06 | 0.93 | 0.67 | 0.38 | 0.09 | 0.09 | 0.05 |
| 1,2-dipalmitoylglycerol                           | 1.07 | 0.44 | 2.17 | 0.36 | 1.25 | 1.05 | 0.33 | 2.85 | 0.49 |
| palmitoyl sphingomyelin                           | 0.87 | 0.67 | 0.84 | 0.82 | 0.96 | 1.02 | 0.94 | 1.43 | 1.21 |
| stearoyl sphingomyelin                            | 1.49 | 0.98 | 1.18 | 1.64 | 1.51 | 2.14 | 1.1  | 1.54 | 1.8  |
| sphingosine 1-phosphate                           | 0.73 | 0.49 | 0.75 | 0.63 | 0.47 | 0.61 | 0.86 | 0.95 | 0.82 |
| sphingosine                                       | 0.88 | 0.76 | 0.21 | 1.08 | 0.96 | 0.24 | 1.22 | 1.26 | 1.16 |
| lathosterol                                       | 0.77 | 0.82 | 1.25 | 1.09 | 1.33 | 1.87 | 1.42 | 1.63 | 1.49 |
| cholesterol                                       | 0.81 | 0.66 | 0.93 | 0.79 | 0.86 | 1.02 | 0.98 | 1.3  | 1.1  |

|                                                |      |      |      |      |      |      |      |      |       |
|------------------------------------------------|------|------|------|------|------|------|------|------|-------|
| 7-beta-hydroxycholesterol                      | 0.48 | 0.86 | 0.6  | 0.78 | 1.15 | 1.02 | 1.63 | 1.33 | 1.71  |
| 7-alpha-hydroxy-3-oxo-4-cholestenoate (7-Hoca) | 0.65 | 0.67 | 0.97 | 0.63 | 0.82 | 0.94 | 0.96 | 1.23 | 0.97  |
| cholestanol                                    | 0.77 | 1.04 | 1.14 | 0.8  | 1.23 | 0.96 | 1.04 | 1.18 | 0.84  |
| beta-sitosterol                                | 0.54 | 0.59 | 1    | 0.54 | 0.59 | 1.06 | 1    | 1    | 1.06  |
| campesterol                                    | 0.61 | 0.43 | 0.72 | 0.69 | 0.65 | 0.4  | 1.13 | 1.51 | 0.56  |
| pregnenolone sulfate                           | 0.75 | 0.75 | 0.64 | 0.79 | 0.84 | 0.61 | 1.05 | 1.12 | 0.94  |
| 21-hydroxypregnenolone disulfate               | 1.5  | 1.06 | 0.74 | 1.5  | 0.78 | 0.97 | 1    | 0.74 | 1.32  |
| 5alpha-pregnan-3beta,20alpha-diol disulfate    | 1.06 | 2.09 | 0.91 | 0.66 | 2.57 | 0.95 | 0.63 | 1.23 | 1.04  |
| 5alpha-pregnan-3alpha,20beta-diol disulfate 1* | 0.63 | 2.56 | 0.88 | 0.58 | 2.99 | 1.01 | 0.92 | 1.17 | 1.14  |
| pregnen-diol disulfate*                        | 1.42 | 1.04 | 1.08 | 1.53 | 0.93 | 1.45 | 1.08 | 0.89 | 1.34  |
| pregn steroid monosulfate*                     | 0.98 | 0.75 | 0.72 | 0.98 | 0.92 | 0.84 | 1    | 1.24 | 1.18  |
| pregnanediol-3-glucuronide                     | 0.68 | 1.75 | 0.94 | 0.44 | 1.09 | 0.85 | 0.64 | 0.62 | 0.9   |
| cortisol                                       | 1.11 | 1.14 | 0.74 | 1.46 | 7.27 | 0.72 | 1.32 | 6.4  | 0.97  |
| cortisone                                      | 0.97 | 0.74 | 0.67 | 1.2  | 0.74 | 1.14 | 1.23 | 1.01 | 1.71  |
| dehydroisoandrosterone sulfate (DHEA-S)        | 1.04 | 0.69 | 0.62 | 0.9  | 0.79 | 0.71 | 0.86 | 1.14 | 1.14  |
| epiandrosterone sulfate                        | 0.95 | 0.63 | 0.59 | 0.74 | 0.69 | 0.79 | 0.78 | 1.09 | 1.34  |
| androsterone sulfate                           | 1.4  | 0.79 | 0.69 | 1    | 0.78 | 0.94 | 0.71 | 0.99 | 1.36  |
| 4-androsten-3beta,17beta-diol disulfate (1)*   | 1.1  | 0.69 | 0.76 | 0.95 | 0.61 | 1.46 | 0.87 | 0.88 | 1.92  |
| 4-androsten-3beta,17beta-diol disulfate (2)*   | 1.39 | 0.85 | 0.83 | 1.16 | 0.76 | 1    | 0.83 | 0.9  | 1.22  |
| 5alpha-androstan-3beta,17beta-diol disulfate   | 1.08 | 0.71 | 0.73 | 0.88 | 0.63 | 1.14 | 0.81 | 0.89 | 1.55  |
| andro steroid monosulfate 2*                   | 1.64 | 1.05 | 0.84 | 1.4  | 0.93 | 0.92 | 0.85 | 0.88 | 1.1   |
| cholate                                        | 0.04 | 0.34 | 0.44 | 0.15 | 0.98 | 0.74 | 3.47 | 2.93 | 1.67  |
| glycocholate                                   | 0.4  | 0.17 | 0.4  | 0.7  | 0.67 | 1.78 | 1.76 | 3.84 | 4.41  |
| taurocholate                                   | 0.82 | 0.17 | 0.31 | 1.08 | 0.36 | 3.64 | 1.31 | 2.05 | 11.78 |
| glycochenodeoxycholate                         | 0.63 | 0.29 | 0.2  | 0.87 | 0.47 | 1.18 | 1.39 | 1.59 | 6.06  |
| taurochenodeoxycholate                         | 1.71 | 0.32 | 0.45 | 1.15 | 0.3  | 2.77 | 0.67 | 0.94 | 6.19  |
| glycodeoxycholate                              | 1.41 | 0.34 | 0.29 | 0.76 | 0.87 | 0.6  | 0.54 | 2.56 | 2.1   |
| taurodeoxycholate                              | 1.65 | 0.2  | 0.29 | 1.13 | 0.3  | 1.53 | 0.68 | 1.53 | 5.23  |
| glycolithocholate sulfate*                     | 2.96 | 0.71 | 0.23 | 3.56 | 1.7  | 0.76 | 1.2  | 2.38 | 3.29  |
| taurolithocholate 3-sulfate                    | 4.28 | 0.33 | 0.73 | 3.56 | 0.56 | 1.2  | 0.83 | 1.72 | 1.64  |
| glycoursodeoxycholate                          | 1.27 | 0.3  | 0.42 | 0.7  | 0.61 | 0.61 | 0.55 | 2.03 | 1.45  |
| hyocholate                                     | 0.71 | 0.5  | 0.79 | 0.71 | 0.57 | 0.56 | 1.01 | 1.13 | 0.7   |
| glycohyocholate                                | 1.13 | 0.37 | 0.74 | 1.55 | 0.59 | 1.4  | 1.38 | 1.58 | 1.9   |
| glycochenate sulfate*                          | 1.06 | 0.9  | 0.57 | 1.35 | 0.86 | 0.98 | 1.28 | 0.95 | 1.7   |
| taurochenate sulfate*                          | 2.69 | 0.85 | 1.42 | 2.06 | 0.68 | 2.05 | 0.77 | 0.8  | 1.44  |
| inosine                                        | 0.86 | 1.51 | 1.72 | 3.04 | 3.52 | 2.3  | 3.53 | 2.34 | 1.34  |
| hypoxanthine                                   | 0.74 | 0.94 | 0.7  | 3.03 | 7.25 | 2.07 | 4.09 | 7.73 | 2.97  |
| xanthine                                       | 0.79 | 0.84 | 0.87 | 1.24 | 1.49 | 1.11 | 1.57 | 1.77 | 1.28  |
| xanthosine                                     | 1.32 | 1.43 | 1.19 | 1.22 | 2.3  | 2.53 | 0.92 | 1.61 | 2.13  |
| 2'-deoxyinosine                                | 1.78 | 5.3  | 1    | 1.83 | 4.2  | 8.54 | 1.03 | 0.79 | 8.54  |
| urate                                          | 1.12 | 0.92 | 0.94 | 0.91 | 0.76 | 0.72 | 0.81 | 0.82 | 0.77  |

|                                    |      |       |      |        |       |       |       |       |       |
|------------------------------------|------|-------|------|--------|-------|-------|-------|-------|-------|
| allantoin                          | 0.43 | 0.38  | 0.31 | 9.42   | 21.79 | 10.08 | 21.79 | 57.52 | 32.06 |
| adenosine 5'-monophosphate (AMP)   | 1    | 21.91 | 1    | 26.36  | 32.11 | 80.16 | 26.36 | 1.47  | 80.16 |
| adenosine                          | 1.21 | 17.92 | 1.12 | 3.14   | 2.05  | 1.76  | 2.6   | 0.11  | 1.57  |
| N1-methyladenosine                 | 1    | 0.89  | 0.91 | 0.64   | 0.53  | 0.48  | 0.64  | 0.59  | 0.53  |
| N6-carbamoylthreonyladenosine      | 0.99 | 1.02  | 1.03 | 1.08   | 1.08  | 1.24  | 1.09  | 1.06  | 1.21  |
| guanosine                          | 1.11 | 0.94  | 1.32 | 0.68   | 0.41  | 0.58  | 0.61  | 0.43  | 0.44  |
| 7-methylguanine                    | 0.7  | 0.9   | 0.87 | 1.01   | 0.88  | 0.75  | 1.45  | 0.98  | 0.87  |
| N1-methylguanosine                 | 1.73 | 2.07  | 0.55 | 1.28   | 1.54  | 1.06  | 0.74  | 0.74  | 1.94  |
| N2,N2-dimethylguanosine            | 1.02 | 1.31  | 1.24 | 0.96   | 0.88  | 1.02  | 0.94  | 0.67  | 0.82  |
| uridine                            | 0.87 | 0.81  | 1.02 | 0.94   | 1.04  | 0.83  | 1.08  | 1.29  | 0.81  |
| pseudouridine                      | 1.04 | 0.79  | 1.09 | 0.96   | 0.78  | 0.81  | 0.92  | 0.99  | 0.75  |
| 5-methyluridine (ribothymidine)    | 0.89 | 0.79  | 1.03 | 0.82   | 0.75  | 1.02  | 0.92  | 0.95  | 0.99  |
| beta-alanine                       | 0.56 | 0.37  | 0.68 | 0.61   | 0.98  | 0.45  | 1.1   | 2.62  | 0.66  |
| N-acetyl-beta-alanine              | 0.81 | 0.69  | 0.76 | 1.37   | 1.15  | 1.42  | 1.68  | 1.67  | 1.86  |
| methylphosphate                    | 0.84 | 0.73  | 0.72 | 0.84   | 0.93  | 0.98  | 0.99  | 1.26  | 1.37  |
| nicotinamide                       | 0.67 | 1.72  | 1.32 | 7.51   | 7.69  | 6.9   | 11.29 | 4.47  | 5.24  |
| N1-Methyl-2-pyridone-5-carboxamide | 2.13 | 0.84  | 1.98 | 1.05   | 0.52  | 0.46  | 0.49  | 0.61  | 0.23  |
| riboflavin (Vitamin B2)            | 1.45 | 0.7   | 0.9  | 1.06   | 0.55  | 0.57  | 0.73  | 0.78  | 0.63  |
| pantothenate                       | 2.53 | 1.67  | 1.26 | 1.52   | 1.11  | 1.32  | 0.6   | 0.67  | 1.04  |
| gulono-1,4-lactone                 | 1.16 | 0.77  | 0.85 | 1.82   | 2.66  | 1.56  | 1.57  | 3.47  | 1.84  |
| ascorbate (Vitamin C)              | 1.72 | 0.42  | 1.1  | 0.08   | 0.02  | 0.07  | 0.05  | 0.05  | 0.06  |
| threonate                          | 1.4  | 0.66  | 1.47 | 0.81   | 0.69  | 0.85  | 0.58  | 1.05  | 0.58  |
| arabonate                          | 1    | 0.69  | 1.2  | 0.93   | 0.67  | 1.08  | 0.94  | 0.97  | 0.9   |
| oxalate (ethanedioate)             | 1.62 | 0.76  | 1.83 | 0.99   | 0.56  | 1.08  | 0.61  | 0.73  | 0.59  |
| alpha-tocopherol                   | 0.84 | 0.64  | 1.08 | 0.52   | 0.6   | 0.58  | 0.62  | 0.93  | 0.54  |
| beta-tocopherol                    | 0.46 | 0.71  | 1.02 | 0.42   | 0.8   | 0.43  | 0.91  | 1.14  | 0.43  |
| gamma-tocopherol                   | 0.23 | 0.6   | 0.69 | 0.39   | 0.64  | 0.61  | 1.71  | 1.07  | 0.88  |
| gamma-CEHC                         | 0.63 | 0.45  | 0.38 | 0.38   | 0.24  | 0.17  | 0.6   | 0.54  | 0.45  |
| gamma-CEHC glucuronide*            | 0.54 | 0.45  | 0.36 | 0.39   | 0.28  | 0.28  | 0.71  | 0.62  | 0.8   |
| alpha-CEHC glucuronide*            | 0.88 | 1.18  | 1.3  | 0.58   | 0.63  | 0.64  | 0.66  | 0.53  | 0.49  |
| heme                               | 2.15 | 5.17  | 3.85 | 108.58 | 94.24 | 104.2 | 50.62 | 18.24 | 27.04 |
| bilirubin (Z,Z)                    | 0.73 | 0.73  | 1.01 | 0.29   | 0.1   | 0.3   | 0.4   | 0.14  | 0.3   |
| bilirubin (E,E)*                   | 1.31 | 0.62  | 1.8  | 0.37   | 0.18  | 0.44  | 0.28  | 0.29  | 0.24  |
| bilirubin (E,Z or Z,E)*            | 1.06 | 1.29  | 1.66 | 1.03   | 2.36  | 3.56  | 0.97  | 1.83  | 2.15  |
| biliverdin                         | 2.3  | 1.07  | 2.32 | 3.03   | 2.43  | 5.87  | 1.32  | 2.26  | 2.53  |
| l-urobilinogen                     | 1.61 | 0.62  | 0.7  | 1.71   | 0.58  | 1.4   | 1.06  | 0.93  | 2     |
| L-urobilin                         | 0.66 | 2.09  | 0.44 | 0.63   | 0.54  | 1.59  | 0.94  | 0.26  | 3.59  |
| pyridoxate                         | 2.04 | 0.88  | 0.88 | 1.6    | 0.49  | 0.57  | 0.79  | 0.55  | 0.64  |
| hippurate                          | 0.53 | 0.4   | 0.3  | 0.83   | 0.69  | 1.3   | 1.58  | 1.73  | 4.29  |
| 2-hydroxyhippurate (salicylurate)  | 0.17 | 1.5   | 0.1  | 0.14   | 0.82  | 0.03  | 0.81  | 0.55  | 0.32  |
| 3-hydroxyhippurate                 | 0.18 | 0.3   | 0.27 | 0.28   | 0.28  | 0.64  | 1.56  | 0.92  | 2.32  |



|                              |      |       |       |      |       |       |       |       |      |
|------------------------------|------|-------|-------|------|-------|-------|-------|-------|------|
| 4-acetaminophen sulfate      | 0.9  | 1.3   | 0.31  | 0.79 | 21.59 | 0.14  | 0.88  | 16.55 | 0.46 |
| 4-acetamidophenol            | 0.55 | 1     | 0.43  | 0.66 | 4.33  | 0.79  | 1.2   | 4.33  | 1.81 |
| 4-acetamidophenylglucuronide | 0.21 | 1.21  | 0.37  | 0.6  | 7.41  | 0.6   | 2.83  | 6.14  | 1.61 |
| ibuprofen acyl glucuronide   | 1    | 0.9   | 1     | 1    | 0.9   | 1     | 1     | 1     | 1    |
| ibuprofen                    | 0.83 | 0.91  | 1     | 0.83 | 0.91  | 1     | 1     | 1     | 1    |
| 2-hydroxyibuprofen           | 1    | 0.8   | 1     | 1    | 0.8   | 1     | 1     | 1     | 1    |
| carboxyibuprofen             | 0.9  | 0.95  | 1     | 0.9  | 0.95  | 1     | 1     | 1     | 1    |
| atenolol                     | 1    | 1     | 0.75  | 1    | 1.44  | 0.72  | 1     | 1.44  | 0.96 |
| desmethylnaproxen sulfate*   | 0.97 | 0.75  | 1     | 0.97 | 0.88  | 1     | 1     | 1.17  | 1    |
| O-desmethylvenlafaxine       | 0.94 | 1     | 1     | 0.94 | 1     | 1     | 1     | 1     | 1    |
| escitalopram                 | 0.85 | 1     | 1     | 0.85 | 1     | 1     | 1     | 1     | 1    |
| fluoxetine                   | 1.18 | 1     | 1     | 0.98 | 1     | 1     | 0.83  | 1     | 1    |
| gabapentin                   | 1    | 1     | 0.48  | 1    | 1     | 0.54  | 1     | 1     | 1.12 |
| hydrochlorothiazide          | 1.05 | 1     | 0.94  | 0.96 | 1     | 0.8   | 0.91  | 1     | 0.85 |
| hydroquinone sulfate         | 1    | 1     | 0.91  | 1    | 1     | 1.06  | 1     | 1     | 1.17 |
| hydroxyioglitazone (M-IV)    | 1    | 1     | 1     | 1    | 1     | 1     | 1     | 1     | 1    |
| ketopioglitazone             | 1    | 1     | 1     | 1    | 1     | 1     | 1     | 1     | 1    |
| lidocaine                    | 8.5  | 18.75 | 12.61 | 1    | 1     | 1     | 0.12  | 0.05  | 0.08 |
| metformin                    | 1    | 0.21  | 0.23  | 1    | 0.29  | 0.33  | 1     | 1.37  | 1.43 |
| metoprolol                   | 0.97 | 1     | 1     | 0.88 | 1     | 1     | 0.91  | 1     | 1    |
| metoprolol acid metabolite*  | 1.11 | 1     | 1     | 1.08 | 1     | 1     | 0.98  | 1     | 1    |
| naproxen                     | 0.49 | 0.33  | 0.86  | 0.03 | 1.25  | 0.86  | 0.07  | 3.82  | 1    |
| norfluoxetine                | 1.09 | 1     | 1     | 1.02 | 1     | 1     | 0.94  | 1     | 1    |
| omeprazole                   | 1    | 1.13  | 1     | 1    | 1     | 1     | 1     | 0.89  | 1    |
| pantoprazole                 | 0.1  | 0.52  | 11.84 | 6.24 | 2.6   | 50.56 | 64.39 | 5.02  | 4.27 |
| pioglitazone*                | 1    | 1     | 1     | 1    | 1     | 1     | 1     | 1     | 1    |
| salicylate                   | 0.39 | 1.37  | 0.1   | 0.24 | 1.68  | 0.13  | 0.63  | 1.23  | 1.33 |
| 1,2-propanediol              | 1.7  | 3.17  | 0.81  | 6.4  | 4.06  | 2.52  | 3.77  | 1.28  | 3.09 |
| 2-aminophenol sulfate        | 0.16 | 0.18  | 1.06  | 0.3  | 0.34  | 0.25  | 1.83  | 1.87  | 0.23 |
| bisphenol A monosulfate      | 1.35 | 1.62  | 0.98  | 1.67 | 2.94  | 2.67  | 1.24  | 1.81  | 2.71 |
| 2-ethylhexanoate             | 0.76 | 0.53  | 0.98  | 0.41 | 0.32  | 0.48  | 0.54  | 0.6   | 0.49 |
| 2-hydroxyisobutyrate         | 1.41 | 0.54  | 7.86  | 0.88 | 9.48  | 0.69  | 0.62  | 17.58 | 0.09 |
| dexpanthenol                 | 1    | 1     | 1     | 1    | 4.61  | 1     | 1     | 4.61  | 1    |
| glycerol 2-phosphate         | 0.92 | 0.78  | 0.68  | 0.8  | 1.58  | 0.99  | 0.88  | 2.03  | 1.45 |
| glycolate (hydroxyacetate)   | 1.24 | 0.74  | 0.79  | 1.59 | 1.26  | 1     | 1.28  | 1.71  | 1.27 |

\* Green and red shaded cells indicate  $p \leq 0.05$  (green indicates that the mean values are significantly higher for that comparison; red - values significantly lower). Light green and light red shaded cells indicate  $0.05 < p < 0.10$  (light green indicates that the mean values trend higher for that comparison; light red - values trend lower).

**Table A2. A Global Metabolomic Study: Analytical Technique of Detection (Platform) and The Percentage of Detection in a Given Group or Time Point (% filled values) for all 476 compounds detected.**

| Biochemical Name      | Platform  | % Filled Values |               |                |           |               |                |               |                   |                    |
|-----------------------|-----------|-----------------|---------------|----------------|-----------|---------------|----------------|---------------|-------------------|--------------------|
|                       |           | GB T2D BL       | GB T2D Pre-Op | GB T2D Post-Op | SG T2D BL | SG T2D Pre-Op | SG T2D Post-Op | SG Non-T2D BL | SG Non-T2D Pre-Op | SG Non-T2D Post-Op |
| glycine               | GC/MS     | 100             | 100           | 100            | 100       | 100           | 100            | 100           | 100               | 100                |
| N-acetylglycine       | GC/MS     | 100             | 100           | 100            | 80        | 100           | 100            | 100           | 100               | 100                |
| dimethylglycine       | GC/MS     | 100             | 100           | 100            | 100       | 100           | 100            | 100           | 100               | 100                |
| betaine               | LC/MS pos | 100             | 100           | 100            | 100       | 100           | 100            | 100           | 100               | 100                |
| serine                | GC/MS     | 100             | 100           | 100            | 100       | 100           | 100            | 100           | 100               | 100                |
| N-acetylserine        | GC/MS     | 100             | 100           | 100            | 100       | 80            | 100            | 100           | 100               | 100                |
| beta-hydroxypyruvate  | GC/MS     | 60              | 80            | 40             | 80        | 60            | 40             | 60            | 80                | 60                 |
| threonine             | LC/MS pos | 100             | 100           | 100            | 100       | 100           | 100            | 100           | 100               | 100                |
| N-acetylthreonine     | LC/MS neg | 100             | 100           | 100            | 100       | 100           | 100            | 100           | 100               | 100                |
| homoserine            | GC/MS     | 60              | 40            | 20             | 60        | 40            | 20             | 20            | 60                | 0                  |
| alanine               | GC/MS     | 100             | 100           | 100            | 100       | 100           | 100            | 100           | 100               | 100                |
| N-acetylalanine       | LC/MS neg | 100             | 100           | 100            | 100       | 100           | 100            | 100           | 100               | 100                |
| aspartate             | GC/MS     | 100             | 100           | 100            | 100       | 100           | 100            | 100           | 100               | 100                |
| asparagine            | GC/MS     | 100             | 100           | 100            | 100       | 100           | 100            | 100           | 100               | 100                |
| glutamate             | LC/MS pos | 100             | 100           | 100            | 100       | 100           | 100            | 100           | 100               | 100                |
| glutamine             | LC/MS pos | 100             | 100           | 100            | 100       | 100           | 100            | 100           | 100               | 100                |
| pyroglutamine*        | LC/MS pos | 100             | 100           | 100            | 100       | 100           | 100            | 100           | 100               | 100                |
| histidine             | LC/MS neg | 100             | 100           | 100            | 100       | 100           | 100            | 100           | 100               | 100                |
| 1-methylhistidine     | GC/MS     | 60              | 40            | 60             | 20        | 0             | 60             | 40            | 40                | 60                 |
| 3-methylhistidine     | LC/MS neg | 100             | 100           | 100            | 100       | 60            | 100            | 100           | 100               | 100                |
| trans-urocanate       | LC/MS pos | 100             | 100           | 100            | 80        | 100           | 100            | 100           | 100               | 100                |
| cis-urocanate         | LC/MS neg | 0               | 20            | 100            | 0         | 40            | 100            | 40            | 60                | 100                |
| imidazole propionate  | LC/MS pos | 40              | 20            | 100            | 20        | 20            | 100            | 20            | 0                 | 80                 |
| lysine                | LC/MS pos | 100             | 100           | 100            | 100       | 100           | 100            | 100           | 100               | 100                |
| glutarylcarntine (C5) | LC/MS pos | 100             | 100           | 100            | 100       | 100           | 100            | 100           | 100               | 100                |
| pipecolate            | LC/MS pos | 100             | 100           | 100            | 100       | 100           | 100            | 100           | 100               | 100                |
| N-acetyl-cadaverine   | LC/MS pos | 0               | 0             | 0              | 0         | 0             | 20             | 0             | 0                 | 0                  |
| phenylalanine         | LC/MS pos | 100             | 100           | 100            | 100       | 100           | 100            | 100           | 100               | 100                |
| N-acetylphenylalanine | LC/MS neg | 100             | 80            | 80             | 100       | 80            | 100            | 100           | 40                | 80                 |
| phenyllactate (PLA)   | LC/MS neg | 100             | 100           | 100            | 100       | 80            | 60             | 100           | 80                | 100                |

|                                   |              |     |     |     |     |     |     |     |     |     |
|-----------------------------------|--------------|-----|-----|-----|-----|-----|-----|-----|-----|-----|
| phenylacetate                     | GC/MS        | 40  | 60  | 80  | 60  | 20  | 80  | 60  | 60  | 20  |
| 4-hydroxyphenylacetate            | GC/MS        | 80  | 60  | 40  | 60  | 40  | 60  | 60  | 40  | 60  |
| phenylacetylglutamine             | LC/MS<br>pos | 100 | 100 | 100 | 100 | 100 | 100 | 100 | 100 | 100 |
| tyrosine                          | LC/MS<br>pos | 100 | 100 | 100 | 100 | 100 | 100 | 100 | 100 | 100 |
| N-acetyltyrosine                  | LC/MS<br>neg | 20  | 0   | 60  | 60  | 0   | 20  | 60  | 40  | 80  |
| tyramine                          | LC/MS<br>pos | 0   | 0   | 0   | 0   | 0   | 20  | 0   | 0   | 0   |
| 3-(4-hydroxyphenyl)lactate        | LC/MS<br>neg | 100 | 100 | 100 | 100 | 100 | 100 | 100 | 100 | 100 |
| phenol sulfate                    | LC/MS<br>neg | 100 | 100 | 100 | 100 | 100 | 100 | 100 | 100 | 100 |
| p-cresol sulfate                  | LC/MS<br>neg | 100 | 100 | 100 | 100 | 80  | 100 | 100 | 100 | 100 |
| o-cresol sulfate                  | LC/MS<br>neg | 80  | 80  | 60  | 0   | 20  | 20  | 20  | 80  | 20  |
| 3-methoxytyrosine                 | LC/MS<br>pos | 100 | 100 | 100 | 100 | 100 | 100 | 100 | 100 | 100 |
| 3-(3-hydroxyphenyl)propionate     | LC/MS<br>neg | 60  | 20  | 0   | 20  | 0   | 20  | 40  | 0   | 40  |
| tryptophan                        | LC/MS<br>pos | 100 | 100 | 100 | 100 | 100 | 100 | 100 | 100 | 100 |
| indolelactate                     | GC/MS        | 100 | 100 | 100 | 100 | 100 | 100 | 100 | 100 | 100 |
| indoleacetate                     | LC/MS<br>pos | 100 | 100 | 100 | 100 | 100 | 100 | 100 | 100 | 100 |
| indolepropionate                  | LC/MS<br>neg | 100 | 60  | 80  | 100 | 60  | 80  | 100 | 100 | 100 |
| 3-indoxyl sulfate                 | LC/MS<br>neg | 100 | 100 | 100 | 100 | 100 | 100 | 100 | 100 | 100 |
| kynurenine                        | LC/MS<br>pos | 100 | 100 | 100 | 100 | 100 | 100 | 100 | 100 | 100 |
| kynurenate                        | LC/MS<br>neg | 100 | 100 | 100 | 100 | 80  | 100 | 100 | 100 | 100 |
| serotonin (5HT)                   | LC/MS<br>pos | 100 | 100 | 80  | 100 | 100 | 80  | 100 | 80  | 80  |
| tryptophan betaine                | LC/MS<br>pos | 100 | 100 | 100 | 100 | 100 | 100 | 100 | 100 | 100 |
| C-glycosyltryptophan              | LC/MS<br>pos | 100 | 100 | 100 | 100 | 100 | 100 | 100 | 100 | 100 |
| leucine                           | LC/MS<br>pos | 100 | 100 | 100 | 100 | 100 | 100 | 100 | 100 | 100 |
| 4-methyl-2-oxopentanoate          | LC/MS<br>neg | 100 | 100 | 100 | 100 | 100 | 100 | 100 | 100 | 100 |
| isovalerate                       | LC/MS<br>neg | 80  | 100 | 80  | 100 | 100 | 100 | 80  | 80  | 100 |
| isovaleryl carnitine              | LC/MS<br>pos | 100 | 100 | 100 | 100 | 80  | 100 | 100 | 100 | 100 |
| beta-hydroxyisovalerate           | LC/MS<br>neg | 100 | 100 | 60  | 100 | 100 | 100 | 100 | 100 | 100 |
| beta-hydroxyisovaleroyl carnitine | LC/MS<br>pos | 100 | 100 | 100 | 100 | 100 | 100 | 100 | 100 | 100 |
| 3-methylglutaryl carnitine (C6)   | LC/MS<br>pos | 100 | 100 | 80  | 100 | 100 | 80  | 100 | 100 | 100 |
| alpha-hydroxyisovalerate          | LC/MS<br>neg | 100 | 100 | 100 | 100 | 100 | 100 | 100 | 100 | 100 |
| isoleucine                        | LC/MS<br>pos | 100 | 100 | 100 | 100 | 100 | 100 | 100 | 100 | 100 |
| 3-methyl-2-oxovalerate            | LC/MS<br>neg | 100 | 100 | 100 | 100 | 100 | 100 | 100 | 100 | 100 |
| 2-methylbutyryl carnitine (C5)    | LC/MS<br>pos | 100 | 100 | 100 | 100 | 80  | 100 | 100 | 100 | 100 |
| tiglyl carnitine                  | LC/MS<br>pos | 100 | 80  | 80  | 100 | 60  | 60  | 100 | 100 | 100 |
| 2-hydroxy-3-methylvalerate        | LC/MS        | 60  | 60  | 40  | 80  | 60  | 60  | 80  | 60  | 60  |



|                                | neg          |     |     |     |     |     |     |     |     |     |
|--------------------------------|--------------|-----|-----|-----|-----|-----|-----|-----|-----|-----|
| 3-hydroxy-2-ethylpropionate    | GC/MS        | 80  | 100 | 100 | 80  | 100 | 80  | 100 | 100 | 100 |
| valine                         | LC/MS<br>pos | 100 | 100 | 100 | 100 | 100 | 100 | 100 | 100 | 100 |
| 3-methyl-2-oxobutyrate         | LC/MS<br>neg | 100 | 100 | 100 | 100 | 100 | 100 | 100 | 100 | 100 |
| isobutyrylcarnitine            | LC/MS<br>pos | 100 | 100 | 100 | 100 | 100 | 100 | 100 | 100 | 100 |
| 3-hydroxyisobutyrate           | GC/MS        | 100 | 100 | 100 | 100 | 100 | 100 | 100 | 100 | 100 |
| alpha-hydroxyisocaproate       | GC/MS        | 20  | 20  | 40  | 20  | 60  | 40  | 60  | 60  | 60  |
| methionine                     | LC/MS<br>pos | 100 | 100 | 100 | 100 | 100 | 100 | 100 | 100 | 100 |
| N-acetylmetionine              | LC/MS<br>neg | 100 | 100 | 100 | 100 | 80  | 100 | 100 | 100 | 100 |
| N-formylmethionine             | LC/MS<br>neg | 100 | 100 | 100 | 100 | 100 | 80  | 100 | 100 | 80  |
| homocysteine                   | GC/MS        | 20  | 0   | 60  | 0   | 0   | 40  | 0   | 0   | 20  |
| alpha-ketobutyrate             | GC/MS        | 40  | 100 | 60  | 100 | 100 | 40  | 80  | 100 | 60  |
| 2-aminobutyrate                | LC/MS<br>pos | 100 | 100 | 100 | 100 | 100 | 100 | 100 | 100 | 100 |
| 2-hydroxybutyrate (AHB)        | GC/MS        | 100 | 100 | 100 | 100 | 100 | 100 | 100 | 100 | 100 |
| cysteine                       | GC/MS        | 100 | 100 | 100 | 100 | 100 | 100 | 100 | 100 | 100 |
| cystine                        | GC/MS        | 100 | 100 | 100 | 100 | 40  | 100 | 100 | 60  | 100 |
| S-methylcysteine               | LC/MS<br>pos | 100 | 100 | 100 | 100 | 100 | 100 | 100 | 100 | 100 |
| 4-amino-2-hydroxybutyrate      | GC/MS        | 100 | 100 | 100 | 100 | 80  | 100 | 100 | 100 | 100 |
| arginine                       | LC/MS<br>pos | 100 | 100 | 80  | 100 | 100 | 100 | 100 | 100 | 100 |
| urea                           | GC/MS        | 100 | 100 | 100 | 100 | 80  | 100 | 100 | 100 | 100 |
| ornithine                      | GC/MS        | 100 | 100 | 100 | 100 | 100 | 100 | 100 | 100 | 100 |
| proline                        | LC/MS<br>pos | 100 | 100 | 100 | 100 | 100 | 100 | 100 | 100 | 100 |
| citrulline                     | LC/MS<br>pos | 100 | 100 | 100 | 100 | 100 | 100 | 100 | 100 | 100 |
| homocitrulline                 | LC/MS<br>pos | 100 | 100 | 100 | 100 | 100 | 100 | 100 | 100 | 100 |
| dimethylarginine (SDMA + ADMA) | LC/MS<br>pos | 100 | 100 | 100 | 100 | 100 | 100 | 100 | 100 | 100 |
| N-delta-acetylornithine*       | LC/MS<br>pos | 100 | 100 | 100 | 100 | 100 | 100 | 100 | 100 | 100 |
| trans-4-hydroxyproline         | GC/MS        | 100 | 100 | 100 | 100 | 100 | 100 | 100 | 100 | 100 |
| pro-hydroxy-pro                | LC/MS<br>pos | 100 | 100 | 100 | 100 | 100 | 100 | 100 | 100 | 100 |
| creatine                       | LC/MS<br>pos | 100 | 100 | 100 | 100 | 100 | 100 | 100 | 100 | 100 |
| creatinine                     | LC/MS<br>pos | 100 | 100 | 100 | 100 | 100 | 100 | 100 | 100 | 100 |
| acisoga                        | LC/MS<br>pos | 100 | 100 | 100 | 100 | 100 | 100 | 100 | 100 | 100 |
| N-acetylputrescine             | LC/MS<br>pos | 80  | 80  | 80  | 80  | 80  | 60  | 80  | 60  | 80  |
| 4-acetamidobutanoate           | LC/MS<br>pos | 100 | 100 | 100 | 100 | 100 | 100 | 100 | 100 | 100 |
| 4-guanidinobutanoate           | LC/MS<br>pos | 80  | 40  | 100 | 100 | 40  | 80  | 60  | 20  | 60  |
| glutathione, oxidized (GSSG)   | LC/MS<br>pos | 100 | 60  | 80  | 60  | 60  | 80  | 80  | 60  | 60  |
| cysteine-glutathione disulfide | LC/MS<br>pos | 80  | 100 | 100 | 100 | 100 | 100 | 100 | 100 | 100 |

|                             |              |     |     |     |     |     |     |     |     |     |
|-----------------------------|--------------|-----|-----|-----|-----|-----|-----|-----|-----|-----|
| cys-gly, oxidized           | LC/MS<br>neg | 60  | 80  | 100 | 100 | 80  | 100 | 100 | 80  | 100 |
| 5-oxoproline                | LC/MS<br>neg | 100 | 100 | 100 | 100 | 100 | 100 | 100 | 100 | 100 |
| ophthalmate                 | LC/MS<br>pos | 0   | 40  | 100 | 20  | 60  | 60  | 40  | 20  | 60  |
| gamma-glutamylalanine       | LC/MS<br>pos | 100 | 100 | 100 | 100 | 100 | 80  | 100 | 100 | 100 |
| gamma-glutamylglutamate     | LC/MS<br>pos | 100 | 80  | 100 | 100 | 80  | 100 | 100 | 100 | 100 |
| gamma-glutamylglutamine     | LC/MS<br>pos | 100 | 100 | 80  | 100 | 100 | 100 | 100 | 100 | 100 |
| gamma-glutamylisoleucine*   | LC/MS<br>pos | 100 | 100 | 100 | 100 | 100 | 100 | 100 | 80  | 100 |
| gamma-glutamylleucine       | LC/MS<br>pos | 100 | 100 | 100 | 100 | 100 | 100 | 100 | 100 | 100 |
| gamma-glutamylmethionine    | LC/MS<br>pos | 100 | 100 | 60  | 100 | 100 | 60  | 100 | 100 | 100 |
| gamma-glutamylphenylalanine | LC/MS<br>pos | 100 | 100 | 100 | 100 | 100 | 100 | 100 | 100 | 100 |
| gamma-glutamylthreonine*    | LC/MS<br>pos | 100 | 100 | 100 | 100 | 100 | 100 | 100 | 100 | 100 |
| gamma-glutamyltyrosine      | LC/MS<br>pos | 100 | 100 | 100 | 100 | 100 | 100 | 100 | 100 | 100 |
| gamma-glutamylvaline        | LC/MS<br>pos | 100 | 100 | 100 | 100 | 100 | 100 | 100 | 100 | 100 |
| N-acetylcarnosine           | LC/MS<br>pos | 100 | 100 | 100 | 100 | 100 | 100 | 100 | 100 | 100 |
| alpha-glutamylglutamate     | LC/MS<br>pos | 40  | 0   | 80  | 0   | 20  | 100 | 20  | 0   | 40  |
| alpha-glutamyltyrosine      | LC/MS<br>pos | 40  | 60  | 40  | 100 | 80  | 40  | 100 | 100 | 80  |
| aspartylleucine             | LC/MS<br>pos | 80  | 80  | 80  | 80  | 40  | 80  | 100 | 80  | 100 |
| aspartylphenylalanine       | LC/MS<br>pos | 100 | 100 | 100 | 100 | 80  | 100 | 100 | 100 | 100 |
| cyclo(glu-glu)              | LC/MS<br>pos | 60  | 20  | 100 | 40  | 20  | 100 | 60  | 0   | 100 |
| cyclo(leu-pro)              | LC/MS<br>pos | 80  | 40  | 40  | 60  | 40  | 40  | 40  | 40  | 60  |
| glycylglycine               | GC/MS        | 100 | 100 | 100 | 60  | 60  | 80  | 100 | 80  | 100 |
| glycylphenylalanine         | LC/MS<br>neg | 100 | 80  | 60  | 20  | 40  | 80  | 100 | 100 | 80  |
| glycylvaline                | LC/MS<br>pos | 100 | 80  | 100 | 100 | 100 | 100 | 100 | 100 | 100 |
| histidyltryptophan          | LC/MS<br>pos | 100 | 100 | 100 | 100 | 100 | 100 | 100 | 100 | 100 |
| isoleucylvaline             | LC/MS<br>pos | 60  | 80  | 20  | 100 | 100 | 40  | 80  | 80  | 20  |
| leucylalanine               | LC/MS<br>pos | 100 | 100 | 80  | 100 | 80  | 100 | 100 | 100 | 100 |
| phenylalanylglutamate       | LC/MS<br>pos | 80  | 60  | 100 | 60  | 40  | 100 | 100 | 60  | 100 |
| phenylalanylleucine         | LC/MS<br>neg | 100 | 80  | 80  | 100 | 100 | 100 | 100 | 100 | 100 |
| phenylalanylphenylalanine   | LC/MS<br>pos | 100 | 100 | 100 | 100 | 100 | 100 | 100 | 100 | 100 |
| phenylalanylserine          | LC/MS<br>pos | 60  | 80  | 80  | 80  | 80  | 60  | 100 | 100 | 100 |
| phenylalanyltryptophan      | LC/MS<br>pos | 100 | 80  | 80  | 100 | 100 | 60  | 100 | 100 | 100 |
| prolylglycine               | LC/MS<br>pos | 80  | 100 | 100 | 80  | 40  | 100 | 80  | 20  | 100 |
| pyroglutamylglycine         | LC/MS<br>neg | 80  | 60  | 100 | 100 | 60  | 100 | 100 | 100 | 100 |
| pyroglutamylvaline          | LC/MS<br>neg | 20  | 20  | 100 | 60  | 0   | 100 | 20  | 20  | 100 |

[illegible]

[illegible]

[illegible]

[illegible]

|                                                   |              |     |     |     |     |     |     |     |     |     |
|---------------------------------------------------|--------------|-----|-----|-----|-----|-----|-----|-----|-----|-----|
| 2-arachidonoylglycerophosphocholine*              | LC/MS<br>pos | 100 | 100 | 80  | 60  | 100 | 100 | 80  | 100 | 80  |
| 1-eicosapentaenoylglycerophosphocholine (20:5n3)* | LC/MS<br>pos | 100 | 100 | 60  | 100 | 60  | 20  | 100 | 80  | 40  |
| 1-docosapentaenoylglycerophosphocholine (22:5n3)* | LC/MS<br>pos | 100 | 100 | 80  | 80  | 80  | 80  | 100 | 80  | 100 |
| 1-docosahexaenoylglycerophosphocholine (22:6n3)*  | LC/MS<br>pos | 100 | 100 | 100 | 100 | 100 | 100 | 100 | 100 | 100 |
| 1-palmitoylplasmenylethanolamine*                 | LC/MS<br>neg | 100 | 100 | 100 | 100 | 100 | 100 | 100 | 100 | 100 |
| 1-stearoylplasmenylethanolamine*                  | LC/MS<br>neg | 100 | 100 | 100 | 100 | 100 | 100 | 100 | 100 | 100 |
| 1-palmitoylglycerophosphoethanolamine             | LC/MS<br>neg | 100 | 100 | 100 | 100 | 100 | 100 | 100 | 100 | 100 |
| 2-palmitoylglycerophosphoethanolamine*            | LC/MS<br>neg | 100 | 100 | 100 | 100 | 100 | 100 | 100 | 100 | 100 |
| 1-stearoylglycerophosphoethanolamine              | LC/MS<br>neg | 100 | 100 | 100 | 100 | 100 | 100 | 100 | 100 | 100 |
| 1-oleoylglycerophosphoethanolamine                | LC/MS<br>neg | 100 | 100 | 100 | 100 | 100 | 100 | 100 | 100 | 100 |
| 2-oleoylglycerophosphoethanolamine*               | LC/MS<br>neg | 100 | 100 | 100 | 100 | 100 | 100 | 100 | 100 | 100 |
| 1-linoleoylglycerophosphoethanolamine*            | LC/MS<br>neg | 100 | 100 | 100 | 100 | 100 | 100 | 100 | 100 | 100 |
| 2-linoleoylglycerophosphoethanolamine*            | LC/MS<br>neg | 100 | 100 | 100 | 100 | 80  | 100 | 100 | 100 | 100 |
| 1-arachidonoylglycerophosphoethanolamine*         | LC/MS<br>neg | 100 | 100 | 100 | 100 | 100 | 100 | 100 | 100 | 100 |
| 2-arachidonoylglycerophosphoethanolamine*         | LC/MS<br>neg | 100 | 100 | 100 | 100 | 100 | 100 | 100 | 100 | 100 |
| 2-docosahexaenoylglycerophosphoethanolamine*      | LC/MS<br>pos | 100 | 80  | 80  | 60  | 20  | 80  | 60  | 80  | 100 |
| 1-docosahexaenoylglycerophosphoethanolamine*      | LC/MS<br>neg | 100 | 100 | 100 | 100 | 100 | 100 | 100 | 100 | 100 |
| 1-palmitoylglycerophosphoinositol*                | LC/MS<br>neg | 100 | 80  | 80  | 100 | 80  | 100 | 100 | 100 | 100 |
| 1-stearoylglycerophosphoinositol                  | LC/MS<br>neg | 100 | 100 | 100 | 100 | 100 | 100 | 100 | 100 | 100 |
| 2-stearoylglycerophosphoinositol*                 | LC/MS<br>neg | 100 | 100 | 80  | 80  | 80  | 40  | 80  | 80  | 80  |
| 1-arachidonoylglycerophosphoinositol*             | LC/MS<br>neg | 100 | 100 | 100 | 100 | 100 | 100 | 100 | 100 | 100 |
| 1-palmitoylglycerophosphate                       | LC/MS<br>neg | 100 | 100 | 80  | 100 | 100 | 100 | 100 | 100 | 100 |
| 1-arachidonoylglycerophosphate                    | LC/MS<br>neg | 100 | 100 | 100 | 100 | 100 | 100 | 100 | 100 | 100 |
| glycerol                                          | GC/MS        | 100 | 100 | 100 | 100 | 100 | 100 | 100 | 100 | 100 |
| glycerol 3-phosphate (G3P)                        | GC/MS        | 100 | 100 | 100 | 100 | 100 | 100 | 100 | 100 | 100 |
| 1-myristoylglycerol (1-monomyristin)              | LC/MS<br>neg | 100 | 100 | 60  | 100 | 80  | 60  | 100 | 100 | 60  |
| 1-palmitoylglycerol (1-monopalmitin)              | GC/MS        | 100 | 100 | 100 | 100 | 100 | 100 | 100 | 100 | 100 |
| 2-palmitoylglycerol (2-monopalmitin)              | GC/MS        | 0   | 20  | 20  | 20  | 80  | 40  | 20  | 20  | 40  |
| 1-stearoylglycerol (1-monostearin)                | GC/MS        | 100 | 100 | 100 | 100 | 100 | 100 | 100 | 100 | 100 |
| 1-oleoylglycerol (1-monolein)                     | GC/MS        | 100 | 100 | 80  | 60  | 80  | 80  | 100 | 100 | 100 |
| 1-linoleoylglycerol (1-monolinolein)              | LC/MS<br>neg | 100 | 100 | 100 | 100 | 100 | 100 | 100 | 100 | 100 |
| 1-linolenoylglycerol                              | LC/MS<br>neg | 100 | 100 | 60  | 60  | 100 | 60  | 100 | 100 | 60  |
| 1,2-dipalmitoylglycerol                           | GC/MS        | 20  | 60  | 60  | 80  | 40  | 100 | 80  | 60  | 60  |
| palmitoyl sphingomyelin                           | GC/MS        | 100 | 100 | 100 | 100 | 100 | 100 | 100 | 100 | 100 |
| stearoyl sphingomyelin                            | GC/MS        | 100 | 100 | 100 | 100 | 100 | 100 | 100 | 100 | 100 |
| sphingosine 1-phosphate                           | LC/MS        | 100 | 100 | 60  | 100 | 100 | 80  | 100 | 100 | 60  |

[illegible]



|                                    |              |     |     |     |     |     |     |     |     |     |
|------------------------------------|--------------|-----|-----|-----|-----|-----|-----|-----|-----|-----|
| hyocholate                         | LC/MS<br>neg | 100 | 100 | 100 | 100 | 100 | 100 | 100 | 100 | 100 |
| glycohyocholate                    | LC/MS<br>neg | 100 | 80  | 100 | 80  | 40  | 60  | 100 | 80  | 100 |
| glycocholenate sulfate*            | LC/MS<br>neg | 100 | 100 | 100 | 100 | 100 | 100 | 100 | 80  | 100 |
| taurocholenate sulfate*            | LC/MS<br>neg | 100 | 100 | 100 | 100 | 100 | 100 | 100 | 100 | 100 |
| inosine                            | LC/MS<br>neg | 100 | 100 | 100 | 100 | 100 | 100 | 100 | 100 | 100 |
| hypoxanthine                       | LC/MS<br>neg | 100 | 100 | 100 | 100 | 100 | 100 | 100 | 100 | 100 |
| xanthine                           | LC/MS<br>pos | 100 | 100 | 100 | 100 | 100 | 100 | 100 | 100 | 100 |
| xanthosine                         | LC/MS<br>pos | 0   | 40  | 60  | 0   | 60  | 80  | 20  | 20  | 60  |
| 2'-deoxyinosine                    | LC/MS<br>neg | 0   | 0   | 80  | 0   | 20  | 80  | 0   | 40  | 60  |
| urate                              | LC/MS<br>neg | 100 | 100 | 100 | 100 | 100 | 100 | 100 | 100 | 100 |
| allantoin                          | GC/MS        | 100 | 80  | 100 | 100 | 40  | 100 | 100 | 80  | 100 |
| adenosine 5'-monophosphate (AMP)   | LC/MS<br>pos | 20  | 0   | 20  | 0   | 40  | 40  | 0   | 0   | 20  |
| adenosine                          | LC/MS<br>pos | 40  | 60  | 80  | 40  | 40  | 60  | 60  | 40  | 60  |
| N1-methyladenosine                 | LC/MS<br>pos | 100 | 100 | 100 | 100 | 100 | 100 | 100 | 100 | 100 |
| N6-carbamoylthreonyladenosine      | LC/MS<br>pos | 100 | 100 | 80  | 100 | 100 | 80  | 100 | 80  | 100 |
| guanosine                          | LC/MS<br>neg | 80  | 100 | 80  | 100 | 100 | 100 | 80  | 80  | 80  |
| 7-methylguanine                    | LC/MS<br>pos | 100 | 100 | 100 | 100 | 100 | 100 | 100 | 100 | 100 |
| N1-methylguanosine                 | LC/MS<br>pos | 100 | 60  | 100 | 80  | 80  | 100 | 20  | 60  | 40  |
| N2,N2-dimethylguanosine            | LC/MS<br>pos | 100 | 100 | 80  | 100 | 100 | 80  | 100 | 80  | 100 |
| uridine                            | LC/MS<br>neg | 100 | 100 | 100 | 100 | 100 | 100 | 100 | 100 | 100 |
| pseudouridine                      | LC/MS<br>neg | 100 | 100 | 100 | 100 | 100 | 100 | 100 | 100 | 100 |
| 5-methyluridine (ribothymidine)    | LC/MS<br>neg | 80  | 100 | 100 | 100 | 80  | 80  | 100 | 100 | 100 |
| beta-alanine                       | GC/MS        | 100 | 100 | 80  | 100 | 60  | 100 | 100 | 100 | 100 |
| N-acetyl-beta-alanine              | LC/MS<br>pos | 100 | 100 | 100 | 100 | 100 | 100 | 100 | 80  | 100 |
| methylphosphate                    | GC/MS        | 100 | 80  | 100 | 100 | 100 | 100 | 100 | 100 | 100 |
| nicotinamide                       | LC/MS<br>pos | 100 | 100 | 100 | 100 | 100 | 100 | 100 | 100 | 100 |
| N1-Methyl-2-pyridone-5-carboxamide | LC/MS<br>pos | 100 | 100 | 60  | 100 | 100 | 100 | 100 | 100 | 100 |
| riboflavin (Vitamin B2)            | LC/MS<br>pos | 80  | 80  | 40  | 80  | 60  | 40  | 60  | 60  | 40  |
| pantothenate                       | LC/MS<br>pos | 100 | 100 | 80  | 100 | 100 | 100 | 100 | 100 | 100 |
| gulono-1,4-lactone                 | GC/MS        | 100 | 100 | 100 | 100 | 100 | 100 | 80  | 100 | 100 |
| ascorbate (Vitamin C)              | GC/MS        | 100 | 80  | 60  | 100 | 100 | 40  | 100 | 100 | 80  |
| threonate                          | GC/MS        | 100 | 100 | 100 | 100 | 100 | 100 | 100 | 100 | 100 |
| arabonate                          | GC/MS        | 100 | 100 | 100 | 100 | 100 | 100 | 100 | 100 | 100 |
| oxalate (ethanedioate)             | GC/MS        | 100 | 80  | 100 | 100 | 100 | 100 | 100 | 100 | 100 |
| alpha-tocopherol                   | GC/MS        | 100 | 100 | 100 | 100 | 100 | 100 | 100 | 100 | 100 |
| beta-tocopherol                    | GC/MS        | 80  | 60  | 0   | 80  | 80  | 60  | 100 | 100 | 80  |

|                                   |              |     |     |     |     |     |     |     |     |     |
|-----------------------------------|--------------|-----|-----|-----|-----|-----|-----|-----|-----|-----|
| gamma-tocopherol                  | GC/MS        | 100 | 100 | 100 | 100 | 100 | 100 | 100 | 100 | 100 |
| gamma-CEHC                        | LC/MS<br>neg | 100 | 100 | 80  | 100 | 80  | 80  | 100 | 100 | 80  |
| gamma-CEHC glucuronide*           | LC/MS<br>neg | 100 | 60  | 60  | 80  | 80  | 20  | 100 | 20  | 0   |
| alpha-CEHC glucuronide*           | LC/MS<br>neg | 60  | 80  | 0   | 60  | 60  | 0   | 20  | 60  | 0   |
| heme                              | LC/MS<br>pos | 100 | 100 | 100 | 100 | 80  | 100 | 100 | 80  | 100 |
| bilirubin (Z,Z)                   | LC/MS<br>neg | 100 | 100 | 80  | 100 | 100 | 60  | 100 | 100 | 80  |
| bilirubin (E,E)*                  | LC/MS<br>pos | 100 | 100 | 80  | 100 | 80  | 100 | 100 | 100 | 100 |
| bilirubin (E,Z or Z,E)*           | LC/MS<br>pos | 80  | 80  | 40  | 60  | 60  | 40  | 80  | 80  | 60  |
| biliverdin                        | LC/MS<br>neg | 80  | 100 | 100 | 100 | 100 | 100 | 100 | 100 | 100 |
| l-urobilinogen                    | LC/MS<br>neg | 80  | 100 | 80  | 100 | 80  | 40  | 80  | 80  | 100 |
| L-urobilin                        | LC/MS<br>pos | 60  | 60  | 80  | 80  | 60  | 40  | 60  | 40  | 40  |
| pyridoxate                        | LC/MS<br>neg | 100 | 100 | 100 | 100 | 100 | 100 | 100 | 100 | 100 |
| hippurate                         | LC/MS<br>neg | 100 | 100 | 100 | 100 | 100 | 100 | 100 | 100 | 100 |
| 2-hydroxyhippurate (salicylurate) | LC/MS<br>neg | 100 | 60  | 80  | 60  | 60  | 80  | 60  | 80  | 80  |
| 3-hydroxyhippurate                | LC/MS<br>neg | 100 | 20  | 80  | 60  | 20  | 40  | 100 | 0   | 60  |
| 4-hydroxyhippurate                | LC/MS<br>neg | 100 | 100 | 100 | 100 | 100 | 100 | 100 | 80  | 80  |
| benzoate                          | GC/MS        | 100 | 100 | 100 | 100 | 100 | 100 | 100 | 100 | 100 |
| catechol sulfate                  | LC/MS<br>neg | 100 | 100 | 100 | 100 | 100 | 100 | 100 | 100 | 100 |
| O-methylcatechol sulfate          | LC/MS<br>neg | 100 | 80  | 80  | 100 | 80  | 100 | 80  | 100 | 80  |
| 3-methyl catechol sulfate (1)     | LC/MS<br>neg | 100 | 40  | 40  | 100 | 20  | 40  | 100 | 40  | 60  |
| 3-methyl catechol sulfate (2)     | LC/MS<br>neg | 60  | 0   | 20  | 0   | 0   | 0   | 40  | 0   | 20  |
| 4-methylcatechol sulfate          | LC/MS<br>neg | 100 | 100 | 100 | 100 | 80  | 100 | 100 | 100 | 100 |
| 3-ethylphenylsulfate*             | LC/MS<br>neg | 20  | 0   | 20  | 20  | 0   | 0   | 0   | 0   | 0   |
| 4-ethylphenylsulfate              | LC/MS<br>neg | 100 | 100 | 100 | 100 | 60  | 60  | 100 | 80  | 60  |
| 4-vinylphenol sulfate             | LC/MS<br>neg | 100 | 80  | 80  | 100 | 40  | 80  | 100 | 100 | 100 |
| caffeine                          | LC/MS<br>pos | 80  | 80  | 100 | 100 | 100 | 100 | 100 | 100 | 100 |
| paraxanthine                      | LC/MS<br>pos | 80  | 60  | 100 | 60  | 100 | 20  | 100 | 80  | 80  |
| theobromine                       | LC/MS<br>pos | 80  | 80  | 100 | 100 | 100 | 100 | 100 | 100 | 100 |
| theophylline                      | LC/MS<br>neg | 80  | 60  | 100 | 80  | 80  | 60  | 80  | 80  | 60  |
| 7-methylurate                     | LC/MS<br>neg | 100 | 80  | 100 | 100 | 100 | 80  | 100 | 80  | 80  |
| 1,3-dimethylurate                 | LC/MS<br>neg | 60  | 60  | 20  | 60  | 40  | 0   | 60  | 20  | 40  |
| 1,7-dimethylurate                 | LC/MS<br>neg | 80  | 60  | 100 | 80  | 60  | 40  | 80  | 80  | 60  |
| 1,3,7-trimethylurate              | LC/MS<br>neg | 60  | 60  | 100 | 80  | 60  | 40  | 80  | 40  | 60  |
| 1-methylxanthine                  | LC/MS<br>pos | 60  | 60  | 80  | 60  | 60  | 60  | 80  | 80  | 60  |

|                                            |              |     |     |     |     |     |     |     |     |     |
|--------------------------------------------|--------------|-----|-----|-----|-----|-----|-----|-----|-----|-----|
| 3-methylxanthine                           | LC/MS<br>pos | 40  | 40  | 20  | 80  | 80  | 60  | 100 | 80  | 40  |
| 7-methylxanthine                           | LC/MS<br>pos | 40  | 40  | 40  | 80  | 80  | 80  | 80  | 80  | 60  |
| 5-acetylamino-6-amino-3-methyluracil       | LC/MS<br>neg | 100 | 100 | 100 | 100 | 100 | 100 | 100 | 100 | 100 |
| cotinine                                   | LC/MS<br>pos | 20  | 0   | 20  | 0   | 0   | 0   | 0   | 0   | 0   |
| 2-piperidinone                             | GC/MS        | 60  | 60  | 40  | 60  | 80  | 60  | 100 | 20  | 60  |
| 1,6-anhydroglucose                         | GC/MS        | 100 | 80  | 100 | 60  | 80  | 80  | 100 | 80  | 100 |
| gluconate                                  | GC/MS        | 100 | 100 | 100 | 100 | 100 | 100 | 100 | 100 | 100 |
| ergothioneine                              | LC/MS<br>pos | 100 | 100 | 100 | 100 | 100 | 100 | 100 | 100 | 80  |
| erythritol                                 | GC/MS        | 100 | 100 | 100 | 100 | 100 | 100 | 100 | 100 | 100 |
| homostachydrine*                           | LC/MS<br>pos | 80  | 80  | 80  | 100 | 80  | 0   | 80  | 60  | 60  |
| N-(2-furoyl)glycine                        | LC/MS<br>pos | 80  | 20  | 60  | 0   | 0   | 0   | 20  | 0   | 20  |
| piperine                                   | LC/MS<br>pos | 100 | 80  | 80  | 100 | 60  | 80  | 100 | 40  | 100 |
| 2-furoic acid                              | GC/MS        | 80  | 80  | 80  | 60  | 40  | 40  | 60  | 20  | 40  |
| quinat                                     | GC/MS        | 60  | 40  | 80  | 40  | 0   | 40  | 80  | 40  | 60  |
| saccharin                                  | LC/MS<br>neg | 20  | 0   | 100 | 40  | 60  | 100 | 60  | 100 | 100 |
| stachydrine                                | LC/MS<br>pos | 100 | 100 | 100 | 100 | 100 | 100 | 100 | 80  | 100 |
| thymol sulfate                             | LC/MS<br>neg | 100 | 100 | 60  | 100 | 80  | 100 | 100 | 60  | 40  |
| tribuloside                                | LC/MS<br>neg | 0   | 0   | 0   | 0   | 20  | 0   | 0   | 0   | 0   |
| 2-hydroxyacetaminophen sulfate*            | LC/MS<br>neg | 40  | 20  | 40  | 0   | 0   | 20  | 20  | 20  | 20  |
| 2-methoxyacetaminophen sulfate*            | LC/MS<br>neg | 20  | 20  | 20  | 0   | 0   | 20  | 20  | 20  | 20  |
| 3-(cystein-S-yl)acetaminophen*             | LC/MS<br>pos | 20  | 20  | 20  | 0   | 0   | 20  | 20  | 0   | 0   |
| 3-(N-acetyl-L-cystein-S-yl) acetaminophen* | LC/MS<br>pos | 20  | 0   | 0   | 0   | 0   | 0   | 0   | 0   | 0   |
| 4-acetaminophen sulfate                    | LC/MS<br>neg | 40  | 40  | 60  | 0   | 40  | 20  | 20  | 20  | 20  |
| 4-acetamidophenol                          | LC/MS<br>pos | 20  | 20  | 40  | 0   | 0   | 20  | 20  | 0   | 20  |
| 4-acetamidophenylglucuronide               | LC/MS<br>neg | 20  | 20  | 20  | 0   | 20  | 20  | 20  | 20  | 20  |
| ibuprofen acyl glucuronide                 | LC/MS<br>neg | 0   | 0   | 0   | 20  | 0   | 0   | 20  | 0   | 0   |
| ibuprofen                                  | LC/MS<br>neg | 0   | 0   | 0   | 40  | 0   | 0   | 20  | 0   | 0   |
| 2-hydroxyibuprofen                         | LC/MS<br>pos | 0   | 0   | 0   | 40  | 0   | 0   | 20  | 0   | 0   |
| carboxyibuprofen                           | LC/MS<br>neg | 0   | 0   | 0   | 40  | 0   | 0   | 20  | 0   | 0   |
| atenolol                                   | LC/MS<br>pos | 20  | 20  | 0   | 0   | 20  | 20  | 0   | 0   | 0   |
| desmethylnaproxen sulfate*                 | LC/MS<br>neg | 0   | 0   | 0   | 20  | 20  | 20  | 20  | 0   | 0   |
| O-desmethylvenlafaxine                     | LC/MS<br>pos | 0   | 0   | 0   | 0   | 0   | 0   | 20  | 0   | 20  |
| escitalopram                               | LC/MS<br>pos | 0   | 0   | 0   | 0   | 0   | 0   | 20  | 20  | 20  |
| fluoxetine                                 | LC/MS<br>pos | 0   | 0   | 0   | 0   | 0   | 0   | 20  | 20  | 20  |
| gabapentin                                 | LC/MS<br>neg | 20  | 20  | 20  | 0   | 0   | 0   | 0   | 0   | 0   |

[illegible]

| Table A3. Conserved Pre-Operation Diet (Pre-op) to Baseline (BL) Changes,<br>p<0.05, q<0.05. |                                       |              |           |           |
|----------------------------------------------------------------------------------------------|---------------------------------------|--------------|-----------|-----------|
| Pathway                                                                                      | Biochemical Name                      | Fold-Change  |           |           |
|                                                                                              |                                       | SG<br>NonT2D | SG<br>T2D | GB<br>T2D |
| Amino Acid                                                                                   | 3-indoxyl sulfate                     | 0.51         | 0.51      | 0.59      |
| Lipid                                                                                        | oleate (18:1n9)                       | 2.84         | 1.74      | 3.11      |
| Lipid                                                                                        | cis-vaccenate (18:1n7)                | 2.18         | 1.52      | 2.07      |
| Lipid                                                                                        | hydroxybutyrylcarnitine*              | 8.65         | 3.87      | 6.95      |
| Lipid                                                                                        | acetoacetate                          | 13.88        | 5.66      | 8.71      |
| Lipid                                                                                        | 3-hydroxybutyrate (BHBA)              | 18.77        | 5.79      | 11.25     |
| Lipid                                                                                        | 2-myristoylglycerophosphocholine      | 0.23         | 0.49      | 0.71      |
| Lipid                                                                                        | 1-linoleoylglycerophosphoethanolamine | 0.51         | 0.52      | 0.6       |
| Lipid                                                                                        | 2-linoleoylglycerophosphoethanolamine | 0.48         | 0.59      | 0.63      |
| Lipid                                                                                        | 1-oleoylglycerol (1-monolein)         | 7.26         | 3.84      | 5.8       |
| Lipid                                                                                        | 1-linoleoylglycerol (1-monolinolein)  | 6.48         | 4.75      | 5.77      |
| Lipid                                                                                        | 1-linolenoylglycerol                  | 9.97         | 7.16      | 7.06      |
| Xenobiotics                                                                                  | 3-methyl catechol sulfate (1)         | 0.15         | 0.21      | 0.02      |
| Xenobiotics                                                                                  | piperine                              | 0.15         | 0.09      | 0.36      |

**Table A4. Conserved Post- Metabolic Surgery (Post-op) to Baseline (BL) Changes, p<0.05, q<0.05.**

| Pathway      | Biochemical Name                    | Fold-Change  |           |           |
|--------------|-------------------------------------|--------------|-----------|-----------|
|              |                                     | SG<br>NonT2D | SG<br>T2D | GB<br>T2D |
| Amino Acid   | serine                              | 2.44         | 4.03      | 2.43      |
| Amino Acid   | N-acetylserine                      | 4.09         | 6.57      | 8.6       |
| Amino Acid   | glutamate                           | 1.85         | 2.48      | 1.96      |
| Amino Acid   | pyroglutamine                       | 2.17         | 1.71      | 1.34      |
| Amino Acid   | trans-urocanate                     | 103.87       | 268.09    | 353.71    |
| Amino Acid   | cis-urocanate                       | 76.94        | 329.32    | 543.33    |
| Amino Acid   | 3-(4-hydroxyphenyl)lactate          | 0.65         | 0.66      | 0.65      |
| Amino Acid   | indolelactate                       | 0.63         | 0.56      | 0.5       |
| Amino Acid   | kynurenine                          | 0.71         | 0.62      | 0.58      |
| Amino Acid   | ornithine                           | 6.39         | 17.59     | 23.2      |
| Amino Acid   | cysteine-glutathione disulfide      | 5.62         | 4.86      | 10.46     |
| Amino Acid   | 5-oxoproline                        | 4.01         | 7.95      | 8.08      |
| Peptide      | gamma-glutamylalanine               | 0.45         | 0.5       | 0.33      |
| Peptide      | gamma-glutamylglutamate             | 3.99         | 5.21      | 6.96      |
| Peptide      | gamma-glutamylthreonine             | 2.24         | 1.81      | 2.31      |
| Peptide      | cyclo(glu-glu)                      | 2.79         | 5.63      | 4.98      |
| Peptide      | isoleucylvaline                     | 0.31         | 0.28      | 0.3       |
| Peptide      | phenylalanylglutamate               | 4.45         | 10.76     | 4.01      |
| Peptide      | prolylglycine                       | 4.23         | 3.09      | 7.75      |
| Peptide      | pyroglutamylvaline                  | 81.09        | 111.34    | 180.96    |
| Peptide      | tyrosylglutamate                    | 2.55         | 7.02      | 5.44      |
| Peptide      | valylarginine                       | 0.25         | 0.4       | 0.36      |
| Carbohydrate | 3-phosphoglycerate                  | 8.83         | 17.11     | 37.08     |
| Carbohydrate | ribulose/xylulose 5-phosphate       | 9.26         | 9.94      | 16.01     |
| Carbohydrate | ribulose                            | 11.87        | 7.51      | 5.14      |
| Carbohydrate | ribose                              | 3.98         | 3.07      | 1.77      |
| Carbohydrate | ribitol                             | 0.8          | 2.37      | 0.77      |
| Carbohydrate | xylulose                            | 8.38         | 16.31     | 10.84     |
| Energy       | malate                              | 2.29         | 4.24      | 3.03      |
| Lipid        | pelargonate (9:0)                   | 0.59         | 0.48      | 0.51      |
| Lipid        | sebacate (decanedioate)             | 5.28         | 3.68      | 6.45      |
| Lipid        | undecanedioate                      | 3.02         | 2.92      | 3.61      |
| Lipid        | 1,11-undecanedicarboxylate          | 4.51         | 8.2       | 26.79     |
| Lipid        | palmitate, methyl ester             | 0.42         | 0.35      | 0.61      |
| Lipid        | 1-myristoylglycerophosphocholine    | 0.27         | 0.31      | 0.28      |
| Lipid        | 1-palmitoleoylglycerophosphocholine | 0.37         | 0.39      | 0.4       |
| Lipid        | 1-oleoylglycerophosphocholine       | 0.37         | 0.42      | 0.51      |
| Lipid        | 1-linoleoylglycerophosphocholine    | 0.31         | 0.3       | 0.39      |
| Lipid        | 2-linoleoylglycerophosphocholine    | 0.36         | 0.31      | 0.39      |

|                      |                                         |        |       |       |
|----------------------|-----------------------------------------|--------|-------|-------|
| Lipid                | 1-linolenoylglycerophosphocholine       | 0.18   | 0.32  | 0.34  |
| Lipid                | 1-dihomo-linoleoylglycerophosphocholine | 0.31   | 0.34  | 0.44  |
| Lipid                | 1-eicosatrienoylglycerophosphocholine   | 0.2    | 0.16  | 0.32  |
| Lipid                | 1-arachidonoylglycerophosphocholine     | 0.46   | 0.37  | 0.49  |
| Lipid                | 1-eicosapentaenoylglycerophosphocholine | 0.15   | 0.2   | 0.5   |
| Lipid                | 1-oleoylglycerophosphoethanolamine      | 0.45   | 0.68  | 0.56  |
| Lipid                | 2-oleoylglycerophosphoethanolamine      | 0.46   | 0.7   | 0.64  |
| Lipid                | 1-linoleoylglycerophosphoethanolamine   | 0.39   | 0.46  | 0.41  |
| Lipid                | 2-linoleoylglycerophosphoethanolamine   | 0.4    | 0.61  | 0.52  |
| Lipid                | 1-stearoylglycerophosphoinositol        | 0.29   | 0.38  | 0.57  |
| Lipid                | glycerol                                | 3.25   | 8.37  | 3.51  |
| Nucleotide           | inosine                                 | 3.04   | 3.52  | 2.3   |
| Nucleotide           | allantoin                               | 9.42   | 21.79 | 10.08 |
| Nucleotide           | N1-methyladenosine                      | 0.64   | 0.53  | 0.48  |
| Cofactors & Vitamins | nicotinamide                            | 7.51   | 7.69  | 6.9   |
| Cofactors & Vitamins | ascorbate (Vitamin C)                   | 0.08   | 0.02  | 0.07  |
| Cofactors & Vitamins | gamma-CEHC                              | 0.38   | 0.24  | 0.17  |
| Cofactors & Vitamins | gamma-CEHC glucuronide                  | 0.39   | 0.28  | 0.28  |
| Cofactors & Vitamins | heme                                    | 108.58 | 94.24 | 104.2 |
| Cofactors & Vitamins | bilirubin (Z,Z)                         | 0.29   | 0.1   | 0.3   |
| Cofactors & Vitamins | bilirubin (E,E)                         | 0.37   | 0.18  | 0.44  |
| Xenobiotics          | benzoate                                | 0.67   | 0.67  | 0.66  |
| Xenobiotics          | catechol sulfate                        | 0.59   | 0.34  | 0.49  |
| Xenobiotics          | piperine                                | 0.29   | 0.2   | 0.44  |
| Xenobiotics          | saccharin                               | 8.01   | 6.92  | 1.17  |

**Table A5. Conserved Post- Metabolic Surgery (Post-op) to Pre-Operation Diet (Pre-op) Changes, p<0.05, q<0.05.**

| Pathway      | Biochemical Name                        | Fold-Change |        |        |
|--------------|-----------------------------------------|-------------|--------|--------|
|              |                                         | SG NonT2D   | SG T2D | GB T2D |
| Amino Acid   | N-acetylserine                          | 4.1         | 7.97   | 8      |
| Amino Acid   | aspartate                               | 2.22        | 4.94   | 2.03   |
| Amino Acid   | glutamate                               | 2.09        | 3.05   | 2.41   |
| Amino Acid   | trans-urocanate                         | 113.05      | 146.41 | 266.35 |
| Amino Acid   | cis-urocanate                           | 99.74       | 229.09 | 431.96 |
| Amino Acid   | 3-methyl-2-oxobutyrate                  | 0.62        | 0.62   | 0.69   |
| Amino Acid   | alpha-ketobutyrate                      | 0.23        | 0.12   | 0.5    |
| Amino Acid   | 2-hydroxybutyrate (AHB)                 | 0.47        | 0.54   | 0.55   |
| Amino Acid   | ornithine                               | 10.81       | 25.39  | 24.82  |
| Amino Acid   | 5-oxoproline                            | 4.98        | 12.04  | 11.32  |
| Peptide      | gamma-glutamylglutamate                 | 3.23        | 6.48   | 7.58   |
| Peptide      | gamma-glutamylisoleucine                | 2.95        | 3.06   | 2.91   |
| Peptide      | gamma-glutamylthreonine                 | 2.55        | 3.22   | 2.46   |
| Peptide      | gamma-glutamyltyrosine                  | 1.97        | 2.35   | 2.56   |
| Peptide      | cyclo(glu-glu)                          | 4.36        | 5.52   | 7.93   |
| Peptide      | phenylalanylglutamate                   | 7.16        | 8.67   | 2.93   |
| Peptide      | prolylglycine                           | 5.18        | 4.23   | 9.68   |
| Peptide      | pyroglutamylvaline                      | 84.99       | 150.6  | 226.67 |
| Peptide      | tyrosylglutamate                        | 2.44        | 5.39   | 4.42   |
| Carbohydrate | 3-phosphoglycerate                      | 8.55        | 16.99  | 39.97  |
| Carbohydrate | pyruvate                                | 0.42        | 0.34   | 0.43   |
| Carbohydrate | ribulose/xylulose 5-phosphate           | 10.7        | 9.94   | 8.37   |
| Carbohydrate | ribulose                                | 7.6         | 8.01   | 4.71   |
| Carbohydrate | maltotriose                             | 3.74        | 8.2    | 2.71   |
| Carbohydrate | sucrose                                 | 9.85        | 89.85  | 44.52  |
| Carbohydrate | fructose                                | 0.38        | 0.78   | 0.35   |
| Carbohydrate | sorbitol                                | 11.31       | 8.49   | 7.56   |
| Carbohydrate | mannose                                 | 0.5         | 0.53   | 0.46   |
| Energy       | malate                                  | 2.91        | 5.42   | 4.43   |
| Lipid        | linolenate [alpha or gamma]             | 0.3         | 0.47   | 0.53   |
| Lipid        | 2-hydroxyglutarate                      | 1.4         | 1.62   | 1.74   |
| Lipid        | undecanedioate                          | 2.25        | 5.35   | 5.93   |
| Lipid        | 1,11-undecanedicarboxylate              | 4.99        | 9.82   | 41.8   |
| Lipid        | acetoacetate                            | 0.15        | 0.08   | 0.41   |
| Lipid        | 1-eicosatrienoylglycerophosphocholine   | 0.35        | 0.47   | 0.41   |
| Lipid        | 1-eicosapentaenoylglycerophosphocholine | 0.24        | 0.4    | 0.45   |
| Lipid        | 1-oleoylglycerol (1-monolein)           | 0.28        | 0.25   | 0.13   |
| Lipid        | 1-linoleoylglycerol (1-monolinolein)    | 0.29        | 0.24   | 0.13   |
| Lipid        | 1-linolenoylglycerol                    | 0.09        | 0.09   | 0.05   |



|                      |                       |       |       |       |
|----------------------|-----------------------|-------|-------|-------|
| Nucleotide           | hypoxanthine          | 4.09  | 7.73  | 2.97  |
| Nucleotide           | allantoin             | 21.79 | 57.52 | 32.06 |
| Nucleotide           | N1-methyladenosine    | 0.64  | 0.59  | 0.53  |
| Cofactors & Vitamins | nicotinamide          | 11.29 | 4.47  | 5.24  |
| Cofactors & Vitamins | ascorbate (Vitamin C) | 0.05  | 0.05  | 0.06  |
| Cofactors & Vitamins | heme                  | 50.62 | 18.24 | 27.04 |
| Cofactors & Vitamins | bilirubin (Z,Z)       | 0.4   | 0.14  | 0.3   |
| Cofactors & Vitamins | bilirubin (E,E)       | 0.28  | 0.29  | 0.24  |
| Xenobiotics          | saccharin             | 3.48  | 4.19  | 12.65 |
